# Supplementary material
Source: PubMed Central journal article supplement (PMC5526752)
Supplement: NIHMS834154-supplement-01.pdf [file NIHMS834154-supplement-01.pdf]

**Supplementary Figure 1. Gating strategy for Langerhans cells.** Cells were gated on based on size and granularity, singlets, live cells, and CD3- cells to identify DCs. Within this population, cells were gated on CD1a+CD207+ cells to isolate Langerhans cells (bottom row, right). FMOs were run on random samples to confirm gating represented CD1a+CD207+ cells.

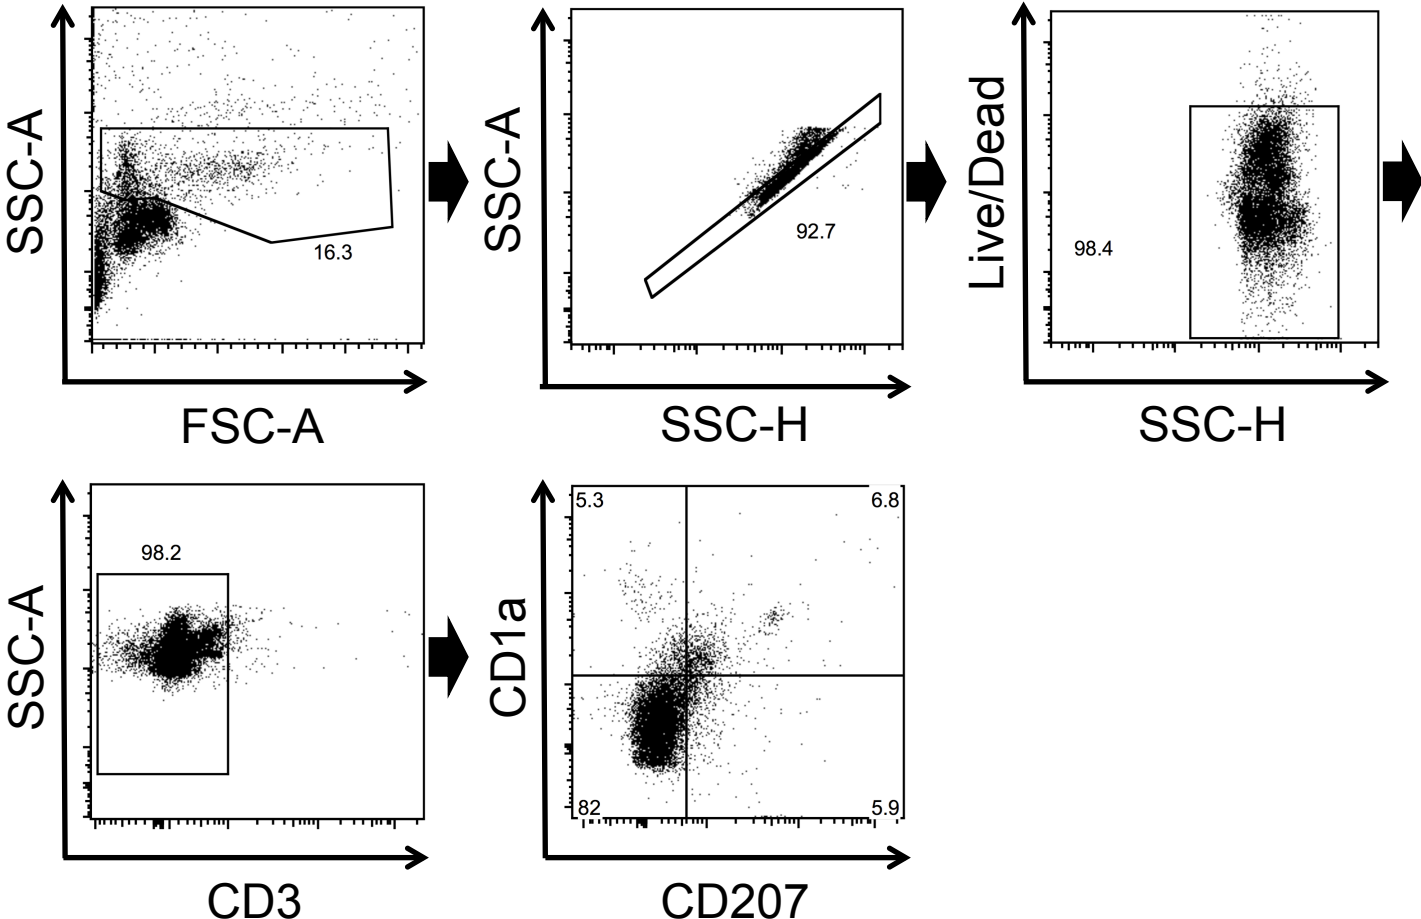

Table S1. Relative proportions of taxa observed in all samples

| ID | Total reads | CST   | <i>Lactobacillus iners</i> | <i>Gardnerella vaginalis</i> | <i>Lactobacillus crispatus</i> | <i>Atopobium vaginae</i> | <i>Lactobacillus gasseri</i> |
|----|-------------|-------|----------------------------|------------------------------|--------------------------------|--------------------------|------------------------------|
| 1  | 5640        | I     | 0.266                      | 0.106                        | 93.688                         | 0.000                    | 0.018                        |
| 2  | 22019       | I     | 0.114                      | 0.023                        | 96.067                         | 0.000                    | 0.000                        |
| 3  | 28941       | III-A | 94.395                     | 0.028                        | 0.021                          | 0.000                    | 0.000                        |
| 4  | 5519        | III-B | 77.242                     | 0.054                        | 0.054                          | 0.000                    | 0.725                        |
| 5  | 3596        | IV-A  | 10.957                     | 45.634                       | 0.028                          | 0.056                    | 0.195                        |
| 6  | 13758       | II    | 0.080                      | 0.029                        | 0.632                          | 0.000                    | 63.926                       |
| 7  | 11609       | IV-B  | 0.009                      | 0.017                        | 0.017                          | 99.268                   | 0.009                        |
| 8  | 15670       | IV-B  | 0.077                      | 0.045                        | 0.013                          | 34.914                   | 0.013                        |
| 9  | 11509       | III-B | 54.201                     | 0.035                        | 40.438                         | 0.009                    | 0.000                        |
| 10 | 13255       | III-B | 82.912                     | 0.000                        | 12.584                         | 0.008                    | 0.000                        |
| 11 | 27287       | IV-A  | 0.744                      | 46.678                       | 0.011                          | 11.859                   | 0.000                        |
| 12 | 10744       | IV-A  | 3.611                      | 40.646                       | 0.009                          | 19.294                   | 0.000                        |
| 13 | 31258       | IV-B  | 41.458                     | 36.544                       | 0.006                          | 6.274                    | 0.000                        |
| 14 | 11410       | III-B | 62.805                     | 0.228                        | 33.514                         | 0.000                    | 0.000                        |
| 15 | 11070       | III-A | 97.173                     | 0.018                        | 0.045                          | 0.000                    | 0.000                        |
| 16 | 29647       | I     | 0.064                      | 0.017                        | 97.207                         | 0.007                    | 0.000                        |
| 17 | 15007       | III-B | 74.932                     | 0.047                        | 21.383                         | 0.027                    | 0.313                        |
| 18 | 19148       | IV-B  | 0.047                      | 0.010                        | 0.005                          | 99.629                   | 0.000                        |
| 19 | 8825        | III-A | 88.635                     | 0.261                        | 0.023                          | 0.011                    | 0.011                        |
| 20 | 13418       | I     | 0.492                      | 0.060                        | 96.728                         | 0.000                    | 0.000                        |
| 21 | 4640        | I     | 0.129                      | 0.108                        | 97.284                         | 0.022                    | 0.000                        |
| 22 | 6098        | III-B | 79.911                     | 0.082                        | 8.626                          | 0.000                    | 0.000                        |
| 23 | 59          | NA    | 18.644                     | 8.475                        | 8.475                          | 6.780                    | 0.000                        |
| 24 | 14147       | III-B | 76.567                     | 0.000                        | 0.014                          | 0.014                    | 1.506                        |
| 25 | 18034       | III-A | 99.373                     | 0.011                        | 0.050                          | 0.006                    | 0.000                        |
| 26 | 18632       | IV-B  | 38.353                     | 34.511                       | 0.054                          | 3.666                    | 0.000                        |
| 27 | 27093       | III-A | 83.793                     | 14.520                       | 0.015                          | 0.011                    | 0.007                        |
| 28 | 14515       | IV-A  | 0.441                      | 50.527                       | 0.034                          | 5.636                    | 0.014                        |
| 29 | 2080        | IV-B  | 25.673                     | 5.962                        | 1.058                          | 0.192                    | 0.144                        |
| 30 | 20645       | IV-A  | 0.775                      | 31.330                       | 0.029                          | 1.337                    | 0.000                        |
| 31 | 27589       | IV-A  | 0.018                      | 45.779                       | 0.029                          | 14.799                   | 0.000                        |
| 32 | 26945       | IV-A  | 0.122                      | 37.454                       | 0.004                          | 5.686                    | 0.004                        |
| 33 | 28412       | III-B | 78.826                     | 18.506                       | 0.004                          | 0.767                    | 0.000                        |
| 34 | 23384       | III-A | 99.461                     | 0.021                        | 0.009                          | 0.004                    | 0.000                        |
| 35 | 11623       | IV-A  | 0.559                      | 22.533                       | 0.026                          | 10.677                   | 0.026                        |
| 36 | 20980       | III-A | 99.113                     | 0.491                        | 0.038                          | 0.005                    | 0.005                        |
| 37 | 24491       | IV-B  | 0.016                      | 41.244                       | 0.008                          | 40.741                   | 0.004                        |
| 38 | 2195        | I     | 7.563                      | 0.091                        | 90.296                         | 0.046                    | 0.000                        |
| 39 | 15868       | III-A | 94.139                     | 0.038                        | 0.006                          | 0.019                    | 0.044                        |
| 40 | 20125       | III-B | 80.566                     | 1.759                        | 14.942                         | 0.000                    | 0.000                        |
| 41 | 9921        | IV-B  | 0.030                      | 0.020                        | 0.222                          | 0.000                    | 0.000                        |
| 42 | 26873       | IV-B  | 0.060                      | 27.898                       | 0.004                          | 14.468                   | 0.004                        |
| 43 | 13753       | III-B | 52.774                     | 0.385                        | 0.102                          | 0.000                    | 0.000                        |
| 44 | 21779       | III-A | 96.524                     | 1.286                        | 0.009                          | 0.051                    | 0.009                        |
| 45 | 23306       | III-A | 94.710                     | 0.116                        | 0.047                          | 0.039                    | 0.017                        |
| 46 | 12158       | I     | 0.090                      | 0.000                        | 57.460                         | 0.000                    | 0.000                        |
| 47 | 16904       | IV-A  | 2.976                      | 32.217                       | 0.006                          | 18.469                   | 0.006                        |
| 48 | 5149        | IV-B  | 22.839                     | 41.561                       | 0.117                          | 14.566                   | 0.000                        |
| 49 | 17385       | II    | 0.029                      | 0.006                        | 0.040                          | 0.006                    | 75.945                       |
| 50 | 17831       | III-A | 92.603                     | 0.062                        | 6.421                          | 0.011                    | 0.056                        |
| 51 | 13968       | IV-A  | 16.652                     | 52.155                       | 0.007                          | 0.021                    | 0.000                        |
| 52 | 26258       | III-A | 99.433                     | 0.011                        | 0.004                          | 0.004                    | 0.000                        |
| 53 | NA          | NA    | NA                         | NA                           | NA                             | NA                       | NA                           |
| 54 | NA          | NA    | NA                         | NA                           | NA                             | NA                       | NA                           |
| 55 | NA          | NA    | NA                         | NA                           | NA                             | NA                       | NA                           |
| 56 | NA          | NA    | NA                         | NA                           | NA                             | NA                       | NA                           |
| 57 | NA          | NA    | NA                         | NA                           | NA                             | NA                       | NA                           |
| 58 | NA          | NA    | NA                         | NA                           | NA                             | NA                       | NA                           |
| 59 | NA          | NA    | NA                         | NA                           | NA                             | NA                       | NA                           |
| 60 | NA          | NA    | NA                         | NA                           | NA                             | NA                       | NA                           |
| 61 | NA          | NA    | NA                         | NA                           | NA                             | NA                       | NA                           |
| 62 | NA          | NA    | NA                         | NA                           | NA                             | NA                       | NA                           |
| 63 | NA          | NA    | NA                         | NA                           | NA                             | NA                       | NA                           |
| 64 | NA          | NA    | NA                         | NA                           | NA                             | NA                       | NA                           |
| 65 | NA          | NA    | NA                         | NA                           | NA                             | NA                       | NA                           |

Table S1.

| ID | BVAB2  | BVAB1  | <i>Lactobacillus jensenii</i> | <i>Bifidobacterium breve</i> | <i>Megasphaera sp. type 1</i> | <i>Prevotella genogroup 2</i> | <i>Sneathia sanguinegens</i> |
|----|--------|--------|-------------------------------|------------------------------|-------------------------------|-------------------------------|------------------------------|
| 1  | 0.000  | 0.000  | 3.723                         | 0.000                        | 0.000                         | 0.018                         | 0.000                        |
| 2  | 0.005  | 0.000  | 0.227                         | 0.000                        | 0.000                         | 0.005                         | 0.000                        |
| 3  | 0.000  | 0.000  | 4.623                         | 0.007                        | 0.000                         | 0.007                         | 0.093                        |
| 4  | 0.000  | 0.000  | 19.170                        | 0.000                        | 0.000                         | 0.000                         | 0.054                        |
| 5  | 0.000  | 0.000  | 0.000                         | 0.000                        | 0.028                         | 4.283                         | 0.028                        |
| 6  | 0.000  | 0.015  | 0.000                         | 2.515                        | 0.029                         | 11.186                        | 0.531                        |
| 7  | 0.000  | 0.000  | 0.000                         | 0.000                        | 0.000                         | 0.000                         | 0.000                        |
| 8  | 0.013  | 0.000  | 0.000                         | 0.000                        | 0.000                         | 0.000                         | 0.255                        |
| 9  | 0.000  | 0.000  | 2.676                         | 0.000                        | 0.000                         | 0.000                         | 0.000                        |
| 10 | 0.000  | 0.000  | 0.098                         | 0.015                        | 0.000                         | 0.008                         | 0.008                        |
| 11 | 6.571  | 0.000  | 0.004                         | 0.000                        | 2.485                         | 0.682                         | 1.851                        |
| 12 | 6.692  | 0.009  | 0.019                         | 0.065                        | 0.363                         | 1.238                         | 0.093                        |
| 13 | 0.058  | 0.003  | 0.003                         | 0.000                        | 2.905                         | 7.835                         | 0.003                        |
| 14 | 0.000  | 0.009  | 0.035                         | 0.000                        | 0.000                         | 0.018                         | 0.009                        |
| 15 | 0.000  | 0.000  | 1.021                         | 0.000                        | 0.009                         | 0.000                         | 0.009                        |
| 16 | 0.007  | 0.000  | 0.003                         | 0.044                        | 0.000                         | 0.000                         | 0.034                        |
| 17 | 0.007  | 0.007  | 0.153                         | 0.013                        | 0.013                         | 0.007                         | 0.027                        |
| 18 | 0.000  | 0.000  | 0.000                         | 0.000                        | 0.000                         | 0.000                         | 0.005                        |
| 19 | 0.011  | 0.011  | 9.178                         | 0.000                        | 0.000                         | 0.000                         | 0.023                        |
| 20 | 0.000  | 0.007  | 0.030                         | 0.000                        | 0.000                         | 0.000                         | 0.015                        |
| 21 | 0.000  | 0.000  | 0.000                         | 0.000                        | 0.000                         | 0.000                         | 0.000                        |
| 22 | 0.000  | 0.000  | 5.362                         | 0.000                        | 0.000                         | 0.000                         | 0.016                        |
| 23 | 0.000  | 1.695  | 45.763                        | 0.000                        | 0.000                         | 0.000                         | 1.695                        |
| 24 | 0.007  | 0.007  | 20.534                        | 0.000                        | 0.000                         | 0.007                         | 0.014                        |
| 25 | 0.006  | 0.006  | 0.011                         | 0.000                        | 0.000                         | 0.017                         | 0.022                        |
| 26 | 0.671  | 3.161  | 0.005                         | 0.000                        | 10.219                        | 0.000                         | 1.814                        |
| 27 | 0.018  | 0.007  | 0.000                         | 0.000                        | 0.007                         | 0.052                         | 0.011                        |
| 28 | 8.977  | 15.212 | 0.007                         | 0.000                        | 3.066                         | 0.028                         | 1.219                        |
| 29 | 0.240  | 0.337  | 0.192                         | 0.048                        | 0.673                         | 0.048                         | 0.625                        |
| 30 | 27.106 | 0.770  | 0.000                         | 0.000                        | 3.536                         | 0.688                         | 1.918                        |
| 31 | 3.476  | 9.739  | 0.000                         | 0.004                        | 3.744                         | 4.194                         | 0.047                        |
| 32 | 1.729  | 25.426 | 0.000                         | 0.011                        | 5.326                         | 0.750                         | 0.197                        |
| 33 | 0.004  | 0.004  | 0.000                         | 0.000                        | 0.000                         | 0.000                         | 0.014                        |
| 34 | 0.000  | 0.000  | 0.000                         | 0.000                        | 0.000                         | 0.000                         | 0.004                        |
| 35 | 12.931 | 0.000  | 0.000                         | 0.000                        | 0.060                         | 12.166                        | 0.886                        |
| 36 | 0.000  | 0.000  | 0.000                         | 0.000                        | 0.000                         | 0.000                         | 0.010                        |
| 37 | 0.000  | 0.000  | 0.000                         | 0.000                        | 0.000                         | 0.000                         | 0.037                        |
| 38 | 0.000  | 0.000  | 0.000                         | 0.000                        | 0.000                         | 0.000                         | 0.000                        |
| 39 | 0.000  | 0.000  | 5.577                         | 0.000                        | 0.000                         | 0.000                         | 0.000                        |
| 40 | 0.000  | 0.005  | 0.253                         | 0.000                        | 0.000                         | 0.000                         | 0.000                        |
| 41 | 0.000  | 0.010  | 0.010                         | 83.641                       | 0.000                         | 0.000                         | 0.010                        |
| 42 | 1.608  | 13.076 | 0.000                         | 0.000                        | 6.546                         | 0.729                         | 0.889                        |
| 43 | 0.000  | 0.000  | 46.237                        | 0.000                        | 0.000                         | 0.000                         | 0.007                        |
| 44 | 0.000  | 0.005  | 1.162                         | 0.000                        | 0.000                         | 0.000                         | 0.005                        |
| 45 | 0.021  | 0.000  | 4.544                         | 0.000                        | 0.051                         | 0.000                         | 0.017                        |
| 46 | 0.000  | 0.000  | 0.025                         | 0.000                        | 0.008                         | 0.000                         | 0.000                        |
| 47 | 6.756  | 0.012  | 0.000                         | 0.000                        | 4.253                         | 18.055                        | 1.248                        |
| 48 | 2.039  | 0.000  | 0.000                         | 0.000                        | 11.400                        | 0.078                         | 0.990                        |
| 49 | 0.000  | 0.000  | 0.006                         | 17.889                       | 0.000                         | 0.000                         | 0.006                        |
| 50 | 0.000  | 0.000  | 0.000                         | 0.000                        | 0.000                         | 0.000                         | 0.331                        |
| 51 | 0.000  | 0.000  | 0.000                         | 0.000                        | 0.007                         | 0.000                         | 0.029                        |
| 52 | 0.000  | 0.000  | 0.000                         | 0.000                        | 0.000                         | 0.004                         | 0.034                        |
| 53 | NA     | NA     | NA                            | NA                           | NA                            | NA                            | NA                           |
| 54 | NA     | NA     | NA                            | NA                           | NA                            | NA                            | NA                           |
| 55 | NA     | NA     | NA                            | NA                           | NA                            | NA                            | NA                           |
| 56 | NA     | NA     | NA                            | NA                           | NA                            | NA                            | NA                           |
| 57 | NA     | NA     | NA                            | NA                           | NA                            | NA                            | NA                           |
| 58 | NA     | NA     | NA                            | NA                           | NA                            | NA                            | NA                           |
| 59 | NA     | NA     | NA                            | NA                           | NA                            | NA                            | NA                           |
| 60 | NA     | NA     | NA                            | NA                           | NA                            | NA                            | NA                           |
| 61 | NA     | NA     | NA                            | NA                           | NA                            | NA                            | NA                           |
| 62 | NA     | NA     | NA                            | NA                           | NA                            | NA                            | NA                           |
| 63 | NA     | NA     | NA                            | NA                           | NA                            | NA                            | NA                           |
| 64 | NA     | NA     | NA                            | NA                           | NA                            | NA                            | NA                           |
| 65 | NA     | NA     | NA                            | NA                           | NA                            | NA                            | NA                           |

Table S1.

| ID | <i>Leptotrichia amnionii</i> | <i>Lactobacillus helveticus</i> | <i>Prevotella bivia</i> | <i>Dialister sp. type 2</i> | <i>Eggerthella</i> | <i>Prevotella genogroup 3</i> | <i>Mobiluncus mulieris</i> |
|----|------------------------------|---------------------------------|-------------------------|-----------------------------|--------------------|-------------------------------|----------------------------|
| 1  | 0.000                        | 1.454                           | 0.018                   | 0.000                       | 0.000              | 0.000                         | 0.000                      |
| 2  | 0.000                        | 2.907                           | 0.005                   | 0.000                       | 0.000              | 0.000                         | 0.000                      |
| 3  | 0.000                        | 0.000                           | 0.017                   | 0.000                       | 0.017              | 0.000                         | 0.000                      |
| 4  | 0.000                        | 0.000                           | 0.018                   | 0.000                       | 0.000              | 0.000                         | 0.000                      |
| 5  | 0.083                        | 0.000                           | 13.960                  | 2.225                       | 0.862              | 0.000                         | 0.000                      |
| 6  | 0.000                        | 0.022                           | 0.174                   | 2.391                       | 0.022              | 0.007                         | 0.000                      |
| 7  | 0.000                        | 0.000                           | 0.000                   | 0.000                       | 0.000              | 0.000                         | 0.000                      |
| 8  | 0.000                        | 0.000                           | 36.650                  | 0.006                       | 0.606              | 0.006                         | 0.000                      |
| 9  | 0.000                        | 1.138                           | 0.000                   | 0.000                       | 0.000              | 0.000                         | 0.000                      |
| 10 | 0.000                        | 1.094                           | 0.015                   | 0.000                       | 0.008              | 0.000                         | 0.000                      |
| 11 | 1.492                        | 0.000                           | 0.000                   | 2.265                       | 4.434              | 11.192                        | 0.000                      |
| 12 | 4.933                        | 0.000                           | 2.783                   | 2.020                       | 2.020              | 0.000                         | 0.000                      |
| 13 | 0.144                        | 0.000                           | 1.219                   | 0.611                       | 0.288              | 0.000                         | 0.000                      |
| 14 | 0.000                        | 1.218                           | 0.000                   | 0.000                       | 0.000              | 0.009                         | 0.000                      |
| 15 | 0.000                        | 0.000                           | 0.000                   | 0.000                       | 0.000              | 0.000                         | 0.000                      |
| 16 | 0.003                        | 2.078                           | 0.000                   | 0.000                       | 0.003              | 0.000                         | 0.000                      |
| 17 | 0.000                        | 1.179                           | 0.000                   | 0.000                       | 0.000              | 0.007                         | 0.000                      |
| 18 | 0.000                        | 0.000                           | 0.000                   | 0.000                       | 0.000              | 0.000                         | 0.000                      |
| 19 | 0.000                        | 0.000                           | 0.045                   | 0.000                       | 0.000              | 0.000                         | 0.000                      |
| 20 | 0.000                        | 1.871                           | 0.007                   | 0.000                       | 0.000              | 0.000                         | 0.000                      |
| 21 | 0.000                        | 2.392                           | 0.000                   | 0.000                       | 0.000              | 0.000                         | 0.000                      |
| 22 | 0.000                        | 5.805                           | 0.000                   | 0.000                       | 0.000              | 0.000                         | 0.000                      |
| 23 | 0.000                        | 0.000                           | 0.000                   | 0.000                       | 0.000              | 0.000                         | 0.000                      |
| 24 | 0.007                        | 0.035                           | 0.000                   | 0.000                       | 0.000              | 0.000                         | 0.000                      |
| 25 | 0.006                        | 0.000                           | 0.006                   | 0.000                       | 0.000              | 0.000                         | 0.000                      |
| 26 | 0.193                        | 0.000                           | 0.000                   | 0.150                       | 0.660              | 0.177                         | 0.000                      |
| 27 | 0.000                        | 0.000                           | 0.081                   | 0.011                       | 0.004              | 0.000                         | 0.000                      |
| 28 | 0.958                        | 0.007                           | 0.000                   | 2.108                       | 1.833              | 1.316                         | 4.395                      |
| 29 | 0.048                        | 0.144                           | 0.000                   | 0.048                       | 0.288              | 0.000                         | 0.000                      |
| 30 | 12.066                       | 0.000                           | 0.005                   | 4.839                       | 5.377              | 0.000                         | 0.000                      |
| 31 | 0.025                        | 0.000                           | 0.004                   | 0.613                       | 2.802              | 0.000                         | 9.935                      |
| 32 | 0.345                        | 0.004                           | 0.007                   | 2.286                       | 4.428              | 0.657                         | 6.680                      |
| 33 | 0.000                        | 0.004                           | 0.000                   | 0.000                       | 0.004              | 0.000                         | 0.000                      |
| 34 | 0.000                        | 0.009                           | 0.017                   | 0.000                       | 0.004              | 0.000                         | 0.000                      |
| 35 | 16.846                       | 0.000                           | 0.034                   | 1.721                       | 1.058              | 0.000                         | 2.116                      |
| 36 | 0.000                        | 0.005                           | 0.000                   | 0.000                       | 0.000              | 0.000                         | 0.000                      |
| 37 | 0.000                        | 0.000                           | 0.000                   | 0.000                       | 0.020              | 0.024                         | 0.000                      |
| 38 | 0.000                        | 1.959                           | 0.000                   | 0.000                       | 0.000              | 0.000                         | 0.000                      |
| 39 | 0.000                        | 0.006                           | 0.000                   | 0.006                       | 0.000              | 0.000                         | 0.000                      |
| 40 | 0.089                        | 0.671                           | 0.000                   | 0.000                       | 0.000              | 0.000                         | 0.000                      |
| 41 | 0.000                        | 0.000                           | 0.000                   | 0.000                       | 0.000              | 0.000                         | 0.000                      |
| 42 | 0.007                        | 0.000                           | 0.804                   | 1.057                       | 0.841              | 5.880                         | 0.000                      |
| 43 | 0.000                        | 0.000                           | 0.007                   | 0.000                       | 0.000              | 0.000                         | 0.000                      |
| 44 | 0.000                        | 0.000                           | 0.014                   | 0.000                       | 0.000              | 0.000                         | 0.000                      |
| 45 | 0.000                        | 0.000                           | 0.013                   | 0.000                       | 0.000              | 0.000                         | 0.000                      |
| 46 | 0.000                        | 42.178                          | 0.000                   | 0.000                       | 0.000              | 0.000                         | 0.000                      |
| 47 | 2.053                        | 0.000                           | 0.396                   | 2.739                       | 0.793              | 0.000                         | 0.006                      |
| 48 | 2.292                        | 0.039                           | 0.000                   | 0.602                       | 0.388              | 0.660                         | 0.000                      |
| 49 | 0.000                        | 0.000                           | 0.184                   | 0.000                       | 0.000              | 0.000                         | 0.000                      |
| 50 | 0.000                        | 0.275                           | 0.000                   | 0.000                       | 0.000              | 0.006                         | 0.000                      |
| 51 | 2.670                        | 0.000                           | 0.086                   | 0.000                       | 0.000              | 0.000                         | 0.000                      |
| 52 | 0.004                        | 0.004                           | 0.008                   | 0.000                       | 0.008              | 0.000                         | 0.000                      |
| 53 | NA                           | NA                              | NA                      | NA                          | NA                 | NA                            | NA                         |
| 54 | NA                           | NA                              | NA                      | NA                          | NA                 | NA                            | NA                         |
| 55 | NA                           | NA                              | NA                      | NA                          | NA                 | NA                            | NA                         |
| 56 | NA                           | NA                              | NA                      | NA                          | NA                 | NA                            | NA                         |
| 57 | NA                           | NA                              | NA                      | NA                          | NA                 | NA                            | NA                         |
| 58 | NA                           | NA                              | NA                      | NA                          | NA                 | NA                            | NA                         |
| 59 | NA                           | NA                              | NA                      | NA                          | NA                 | NA                            | NA                         |
| 60 | NA                           | NA                              | NA                      | NA                          | NA                 | NA                            | NA                         |
| 61 | NA                           | NA                              | NA                      | NA                          | NA                 | NA                            | NA                         |
| 62 | NA                           | NA                              | NA                      | NA                          | NA                 | NA                            | NA                         |
| 63 | NA                           | NA                              | NA                      | NA                          | NA                 | NA                            | NA                         |
| 64 | NA                           | NA                              | NA                      | NA                          | NA                 | NA                            | NA                         |
| 65 | NA                           | NA                              | NA                      | NA                          | NA                 | NA                            | NA                         |

Table S1.

| ID | <i>Prevotella genogroup 1</i> | <i>Aerococcus christensenii</i> | <i>Parvimonas micra</i> | <i>Mycoplasma hominis</i> | <i>Gemella</i> | <i>Prevotella melaninogenica</i> | <i>BVAB3</i> |
|----|-------------------------------|---------------------------------|-------------------------|---------------------------|----------------|----------------------------------|--------------|
| 1  | 0.000                         | 0.000                           | 0.000                   | 0.000                     | 0.000          | 0.000                            | 0.000        |
| 2  | 0.000                         | 0.000                           | 0.000                   | 0.023                     | 0.005          | 0.000                            | 0.000        |
| 3  | 0.000                         | 0.010                           | 0.000                   | 0.017                     | 0.000          | 0.000                            | 0.000        |
| 4  | 0.000                         | 0.036                           | 0.000                   | 0.000                     | 0.000          | 0.000                            | 0.000        |
| 5  | 0.000                         | 0.000                           | 0.028                   | 0.000                     | 5.868          | 0.000                            | 0.000        |
| 6  | 0.000                         | 0.545                           | 0.022                   | 0.029                     | 0.000          | 0.000                            | 0.000        |
| 7  | 0.000                         | 0.009                           | 0.000                   | 0.000                     | 0.000          | 0.000                            | 0.000        |
| 8  | 0.000                         | 1.027                           | 0.000                   | 6.752                     | 10.708         | 1.966                            | 0.000        |
| 9  | 0.000                         | 0.000                           | 0.000                   | 0.009                     | 0.000          | 0.000                            | 0.000        |
| 10 | 0.000                         | 0.000                           | 0.000                   | 0.008                     | 0.000          | 0.000                            | 0.000        |
| 11 | 0.000                         | 0.150                           | 1.939                   | 0.004                     | 0.000          | 0.000                            | 5.504        |
| 12 | 0.009                         | 0.289                           | 0.019                   | 0.009                     | 1.275          | 0.000                            | 0.000        |
| 13 | 0.000                         | 0.285                           | 0.000                   | 0.000                     | 0.022          | 0.000                            | 0.000        |
| 14 | 0.000                         | 0.000                           | 0.000                   | 0.000                     | 0.009          | 0.000                            | 0.000        |
| 15 | 0.000                         | 0.009                           | 0.000                   | 0.000                     | 0.000          | 0.000                            | 0.000        |
| 16 | 0.000                         | 0.007                           | 0.000                   | 0.007                     | 0.000          | 0.000                            | 0.007        |
| 17 | 0.000                         | 0.013                           | 0.000                   | 0.007                     | 0.000          | 0.000                            | 0.000        |
| 18 | 0.000                         | 0.000                           | 0.000                   | 0.000                     | 0.000          | 0.000                            | 0.000        |
| 19 | 0.000                         | 0.000                           | 0.000                   | 0.000                     | 0.000          | 0.000                            | 0.000        |
| 20 | 0.000                         | 0.000                           | 0.000                   | 0.000                     | 0.000          | 0.000                            | 0.000        |
| 21 | 0.000                         | 0.000                           | 0.000                   | 0.000                     | 0.000          | 0.000                            | 0.000        |
| 22 | 0.000                         | 0.000                           | 0.000                   | 0.016                     | 0.000          | 0.000                            | 0.000        |
| 23 | 0.000                         | 0.000                           | 0.000                   | 0.000                     | 0.000          | 0.000                            | 0.000        |
| 24 | 0.000                         | 0.057                           | 0.000                   | 0.049                     | 0.000          | 0.000                            | 0.000        |
| 25 | 0.000                         | 0.000                           | 0.000                   | 0.000                     | 0.000          | 0.000                            | 0.000        |
| 26 | 0.301                         | 0.499                           | 0.220                   | 0.027                     | 0.134          | 0.000                            | 0.011        |
| 27 | 0.000                         | 0.672                           | 0.007                   | 0.004                     | 0.122          | 0.000                            | 0.000        |
| 28 | 0.393                         | 0.110                           | 0.462                   | 0.041                     | 0.324          | 0.000                            | 0.654        |
| 29 | 0.048                         | 2.356                           | 0.144                   | 0.288                     | 0.240          | 0.000                            | 0.000        |
| 30 | 0.000                         | 0.450                           | 3.178                   | 0.334                     | 1.366          | 0.000                            | 0.000        |
| 31 | 0.004                         | 0.203                           | 0.598                   | 0.004                     | 0.413          | 0.000                            | 0.406        |
| 32 | 0.130                         | 0.427                           | 0.958                   | 0.583                     | 0.260          | 0.000                            | 0.468        |
| 33 | 0.000                         | 1.309                           | 0.000                   | 0.000                     | 0.000          | 0.000                            | 0.000        |
| 34 | 0.004                         | 0.009                           | 0.004                   | 0.000                     | 0.000          | 0.000                            | 0.000        |
| 35 | 0.000                         | 0.129                           | 0.000                   | 0.120                     | 0.026          | 0.009                            | 0.000        |
| 36 | 0.000                         | 0.062                           | 0.000                   | 0.000                     | 0.000          | 0.000                            | 0.000        |
| 37 | 0.000                         | 0.000                           | 0.000                   | 0.000                     | 0.000          | 8.468                            | 0.000        |
| 38 | 0.000                         | 0.000                           | 0.000                   | 0.000                     | 0.000          | 0.000                            | 0.000        |
| 39 | 0.006                         | 0.000                           | 0.000                   | 0.000                     | 0.006          | 0.000                            | 0.006        |
| 40 | 0.000                         | 0.020                           | 0.000                   | 0.005                     | 0.000          | 0.000                            | 0.000        |
| 41 | 0.000                         | 0.000                           | 0.000                   | 0.000                     | 0.000          | 0.000                            | 0.000        |
| 42 | 0.000                         | 0.287                           | 2.169                   | 0.019                     | 0.000          | 1.395                            | 0.599        |
| 43 | 0.000                         | 0.007                           | 0.000                   | 0.000                     | 0.007          | 0.000                            | 0.000        |
| 44 | 0.000                         | 0.675                           | 0.000                   | 0.000                     | 0.028          | 0.000                            | 0.000        |
| 45 | 0.004                         | 0.000                           | 0.000                   | 0.013                     | 0.000          | 0.000                            | 0.000        |
| 46 | 0.000                         | 0.008                           | 0.000                   | 0.000                     | 0.000          | 0.000                            | 0.008        |
| 47 | 0.000                         | 0.343                           | 1.142                   | 0.006                     | 0.118          | 0.000                            | 0.000        |
| 48 | 0.350                         | 1.068                           | 0.291                   | 0.000                     | 0.039          | 0.000                            | 0.039        |
| 49 | 0.000                         | 0.012                           | 0.000                   | 0.006                     | 0.000          | 0.000                            | 0.000        |
| 50 | 0.006                         | 0.011                           | 0.000                   | 0.000                     | 0.000          | 0.000                            | 0.000        |
| 51 | 0.000                         | 16.015                          | 0.000                   | 10.696                    | 0.566          | 0.000                            | 0.000        |
| 52 | 0.004                         | 0.008                           | 0.000                   | 0.000                     | 0.000          | 0.004                            | 0.000        |
| 53 | NA                            | NA                              | NA                      | NA                        | NA             | NA                               | NA           |
| 54 | NA                            | NA                              | NA                      | NA                        | NA             | NA                               | NA           |
| 55 | NA                            | NA                              | NA                      | NA                        | NA             | NA                               | NA           |
| 56 | NA                            | NA                              | NA                      | NA                        | NA             | NA                               | NA           |
| 57 | NA                            | NA                              | NA                      | NA                        | NA             | NA                               | NA           |
| 58 | NA                            | NA                              | NA                      | NA                        | NA             | NA                               | NA           |
| 59 | NA                            | NA                              | NA                      | NA                        | NA             | NA                               | NA           |
| 60 | NA                            | NA                              | NA                      | NA                        | NA             | NA                               | NA           |
| 61 | NA                            | NA                              | NA                      | NA                        | NA             | NA                               | NA           |
| 62 | NA                            | NA                              | NA                      | NA                        | NA             | NA                               | NA           |
| 63 | NA                            | NA                              | NA                      | NA                        | NA             | NA                               | NA           |
| 64 | NA                            | NA                              | NA                      | NA                        | NA             | NA                               | NA           |
| 65 | NA                            | NA                              | NA                      | NA                        | NA             | NA                               | NA           |

Table S1.

| ID | <i>Fusobacterium nucleatum</i> | <i>Prevotella buccalis</i> | <i>Candida</i> | <i>Division TM7 vaginal</i> | <i>Prevotella disiens</i> | <i>Streptococcus anginosus</i> |
|----|--------------------------------|----------------------------|----------------|-----------------------------|---------------------------|--------------------------------|
| 1  | 0.000                          | 0.000                      |                | 0.000                       | 0.000                     | 0.000                          |
| 2  | 0.005                          | 0.000                      |                | 0.000                       | 0.000                     | 0.036                          |
| 3  | 0.003                          | 0.007                      |                | 0.000                       | 0.000                     | 0.000                          |
| 4  | 0.018                          | 0.000                      |                | 0.000                       | 0.000                     | 0.000                          |
| 5  | 0.028                          | 0.000                      |                | 0.000                       | 0.000                     | 0.000                          |
| 6  | 0.007                          | 0.502                      |                | 0.000                       | 0.276                     | 1.752                          |
| 7  | 0.000                          | 0.000                      |                | 0.000                       | 0.000                     | 0.000                          |
| 8  | 0.262                          | 0.000                      |                | 0.026                       | 0.000                     | 0.089                          |
| 9  | 0.000                          | 0.000                      |                | 0.000                       | 0.000                     | 0.017                          |
| 10 | 0.000                          | 0.000                      |                | 0.008                       | 0.000                     | 0.060                          |
| 11 | 0.000                          | 0.033                      |                | 0.004                       | 0.007                     | 0.000                          |
| 12 | 0.000                          | 10.471                     |                | 0.009                       | 0.875                     | 0.000                          |
| 13 | 0.003                          | 0.048                      |                | 0.003                       | 0.010                     | 0.051                          |
| 14 | 0.000                          | 0.000                      |                | 0.000                       | 0.000                     | 0.000                          |
| 15 | 0.000                          | 0.000                      |                | 0.000                       | 0.000                     | 0.009                          |
| 16 | 0.003                          | 0.000                      |                | 0.003                       | 0.000                     | 0.013                          |
| 17 | 0.007                          | 0.000                      |                | 0.000                       | 0.000                     | 0.000                          |
| 18 | 0.000                          | 0.000                      |                | 0.000                       | 0.000                     | 0.000                          |
| 19 | 0.000                          | 0.000                      |                | 0.000                       | 0.000                     | 0.011                          |
| 20 | 0.104                          | 0.000                      |                | 0.000                       | 0.000                     | 0.000                          |
| 21 | 0.000                          | 0.000                      |                | 0.000                       | 0.000                     | 0.000                          |
| 22 | 0.016                          | 0.000                      |                | 0.000                       | 0.000                     | 0.000                          |
| 23 | 0.000                          | 0.000                      |                | 0.000                       | 0.000                     | 1.695                          |
| 24 | 0.000                          | 0.000                      |                | 0.000                       | 0.000                     | 0.000                          |
| 25 | 0.000                          | 0.006                      |                | 0.000                       | 0.000                     | 0.006                          |
| 26 | 0.000                          | 0.000                      |                | 4.551                       | 0.000                     | 0.000                          |
| 27 | 0.000                          | 0.000                      |                | 0.004                       | 0.000                     | 0.004                          |
| 28 | 0.000                          | 0.076                      |                | 0.000                       | 0.014                     | 0.000                          |
| 29 | 0.721                          | 0.000                      |                | 0.673                       | 0.000                     | 0.048                          |
| 30 | 0.015                          | 0.276                      |                | 2.068                       | 0.005                     | 0.000                          |
| 31 | 0.004                          | 0.319                      |                | 0.000                       | 0.004                     | 0.000                          |
| 32 | 0.026                          | 0.100                      |                | 1.677                       | 0.007                     | 0.004                          |
| 33 | 0.000                          | 0.000                      |                | 0.004                       | 0.000                     | 0.000                          |
| 34 | 0.000                          | 0.000                      |                | 0.000                       | 0.000                     | 0.000                          |
| 35 | 0.000                          | 0.215                      |                | 0.009                       | 13.792                    | 0.000                          |
| 36 | 0.000                          | 0.000                      |                | 0.000                       | 0.000                     | 0.000                          |
| 37 | 0.000                          | 2.062                      |                | 0.000                       | 0.000                     | 0.102                          |
| 38 | 0.000                          | 0.000                      |                | 0.000                       | 0.000                     | 0.000                          |
| 39 | 0.000                          | 0.000                      |                | 0.000                       | 0.000                     | 0.000                          |
| 40 | 0.000                          | 0.000                      |                | 0.000                       | 0.000                     | 0.025                          |
| 41 | 0.000                          | 0.000                      |                | 0.000                       | 0.000                     | 15.109                         |
| 42 | 8.283                          | 0.115                      |                | 0.826                       | 1.038                     | 0.461                          |
| 43 | 0.000                          | 0.000                      |                | 0.000                       | 0.000                     | 0.051                          |
| 44 | 0.000                          | 0.000                      |                | 0.000                       | 0.000                     | 0.000                          |
| 45 | 0.004                          | 0.000                      |                | 0.000                       | 0.000                     | 0.000                          |
| 46 | 0.000                          | 0.000                      |                | 0.000                       | 0.000                     | 0.000                          |
| 47 | 0.006                          | 0.763                      |                | 0.000                       | 0.018                     | 0.000                          |
| 48 | 0.000                          | 0.058                      |                | 0.000                       | 0.000                     | 0.000                          |
| 49 | 0.000                          | 0.000                      |                | 0.000                       | 0.000                     | 0.000                          |
| 50 | 0.006                          | 0.000                      |                | 0.000                       | 0.000                     | 0.000                          |
| 51 | 0.000                          | 0.000                      |                | 0.000                       | 0.000                     | 0.050                          |
| 52 | 0.011                          | 0.000                      |                | 0.000                       | 0.000                     | 0.000                          |
| 53 | NA                             | NA                         | NA             |                             | NA                        | NA                             |
| 54 | NA                             | NA                         | NA             |                             | NA                        | NA                             |
| 55 | NA                             | NA                         | NA             |                             | NA                        | NA                             |
| 56 | NA                             | NA                         | NA             |                             | NA                        | NA                             |
| 57 | NA                             | NA                         | NA             |                             | NA                        | NA                             |
| 58 | NA                             | NA                         | NA             |                             | NA                        | NA                             |
| 59 | NA                             | NA                         | NA             |                             | NA                        | NA                             |
| 60 | NA                             | NA                         | NA             |                             | NA                        | NA                             |
| 61 | NA                             | NA                         | NA             |                             | NA                        | NA                             |
| 62 | NA                             | NA                         | NA             |                             | NA                        | NA                             |
| 63 | NA                             | NA                         | NA             |                             | NA                        | NA                             |
| 64 | NA                             | NA                         | NA             |                             | NA                        | NA                             |
| 65 | NA                             | NA                         | NA             |                             | NA                        | NA                             |

Table S1.

| ID | <i>Dialister sp. type 1</i> | <i>Corynebacterium accolens</i> | <i>Peptoniphilus harei</i> | <i>Mobiluncus curtisii</i> | <i>Streptococcus agalactiae</i> | <i>Ureaplasma parvum</i> |
|----|-----------------------------|---------------------------------|----------------------------|----------------------------|---------------------------------|--------------------------|
| 1  | 0.000                       | 0.089                           | 0.000                      | 0.000                      | 0.000                           | 0.035                    |
| 2  | 0.005                       | 0.182                           | 0.005                      | 0.000                      | 0.014                           | 0.023                    |
| 3  | 0.000                       | 0.180                           | 0.003                      | 0.000                      | 0.038                           | 0.069                    |
| 4  | 0.000                       | 0.181                           | 0.000                      | 0.000                      | 0.290                           | 0.109                    |
| 5  | 1.196                       | 0.028                           | 1.696                      | 0.000                      | 0.000                           | 0.028                    |
| 6  | 0.254                       | 0.356                           | 1.817                      | 0.022                      | 0.000                           | 0.073                    |
| 7  | 0.396                       | 0.052                           | 0.009                      | 0.000                      | 0.017                           | 0.017                    |
| 8  | 1.347                       | 0.096                           | 0.019                      | 0.000                      | 0.000                           | 0.243                    |
| 9  | 0.000                       | 0.070                           | 0.000                      | 0.000                      | 0.000                           | 0.052                    |
| 10 | 0.000                       | 0.453                           | 0.015                      | 0.000                      | 1.780                           | 0.279                    |
| 11 | 0.308                       | 0.000                           | 0.755                      | 0.139                      | 0.000                           | 0.044                    |
| 12 | 0.447                       | 0.009                           | 0.019                      | 0.009                      | 0.009                           | 0.298                    |
| 13 | 0.134                       | 0.003                           | 0.102                      | 0.000                      | 0.000                           | 0.042                    |
| 14 | 0.000                       | 0.026                           | 0.009                      | 0.000                      | 0.000                           | 0.044                    |
| 15 | 0.000                       | 0.009                           | 0.000                      | 0.000                      | 0.009                           | 0.117                    |
| 16 | 0.000                       | 0.044                           | 0.003                      | 0.000                      | 0.010                           | 0.054                    |
| 17 | 0.000                       | 0.113                           | 0.000                      | 0.000                      | 0.000                           | 0.107                    |
| 18 | 0.000                       | 0.026                           | 0.005                      | 0.000                      | 0.000                           | 0.214                    |
| 19 | 0.000                       | 0.000                           | 0.000                      | 0.000                      | 0.023                           | 0.476                    |
| 20 | 0.000                       | 0.067                           | 0.007                      | 0.000                      | 0.007                           | 0.045                    |
| 21 | 0.000                       | 0.000                           | 0.000                      | 0.000                      | 0.000                           | 0.022                    |
| 22 | 0.000                       | 0.000                           | 0.000                      | 0.000                      | 0.016                           | 0.000                    |
| 23 | 0.000                       | 0.000                           | 3.390                      | 0.000                      | 0.000                           | 0.000                    |
| 24 | 0.000                       | 0.742                           | 0.000                      | 0.007                      | 0.000                           | 0.099                    |
| 25 | 0.000                       | 0.128                           | 0.006                      | 0.000                      | 0.000                           | 0.105                    |
| 26 | 0.048                       | 0.000                           | 0.021                      | 0.000                      | 0.011                           | 0.118                    |
| 27 | 0.030                       | 0.033                           | 0.011                      | 0.000                      | 0.000                           | 0.111                    |
| 28 | 0.158                       | 0.041                           | 0.014                      | 0.034                      | 0.007                           | 0.338                    |
| 29 | 0.000                       | 35.048                          | 0.337                      | 0.000                      | 0.048                           | 0.625                    |
| 30 | 0.475                       | 0.000                           | 1.230                      | 0.000                      | 0.005                           | 0.325                    |
| 31 | 0.221                       | 0.018                           | 0.076                      | 0.014                      | 0.004                           | 0.036                    |
| 32 | 0.312                       | 0.111                           | 0.067                      | 0.007                      | 0.000                           | 0.256                    |
| 33 | 0.014                       | 0.000                           | 0.000                      | 0.000                      | 0.004                           | 0.229                    |
| 34 | 0.000                       | 0.073                           | 0.004                      | 0.000                      | 0.000                           | 0.056                    |
| 35 | 0.318                       | 0.009                           | 0.000                      | 0.052                      | 0.000                           | 0.499                    |
| 36 | 0.000                       | 0.000                           | 0.005                      | 0.000                      | 0.000                           | 0.110                    |
| 37 | 1.388                       | 0.033                           | 0.176                      | 0.000                      | 0.000                           | 0.033                    |
| 38 | 0.000                       | 0.000                           | 0.000                      | 0.000                      | 0.000                           | 0.046                    |
| 39 | 0.000                       | 0.000                           | 0.000                      | 0.000                      | 0.013                           | 0.088                    |
| 40 | 0.005                       | 0.025                           | 0.000                      | 0.000                      | 0.015                           | 0.159                    |
| 41 | 0.071                       | 0.000                           | 0.000                      | 0.000                      | 0.000                           | 0.081                    |
| 42 | 0.491                       | 0.629                           | 0.554                      | 0.134                      | 0.004                           | 0.115                    |
| 43 | 0.000                       | 0.015                           | 0.000                      | 0.000                      | 0.007                           | 0.065                    |
| 44 | 0.000                       | 0.000                           | 0.000                      | 0.000                      | 0.000                           | 0.124                    |
| 45 | 0.000                       | 0.077                           | 0.004                      | 0.000                      | 0.034                           | 0.069                    |
| 46 | 0.000                       | 0.000                           | 0.000                      | 0.000                      | 0.000                           | 0.090                    |
| 47 | 0.308                       | 0.000                           | 0.000                      | 6.111                      | 0.000                           | 0.012                    |
| 48 | 0.078                       | 0.000                           | 0.000                      | 0.019                      | 0.000                           | 0.194                    |
| 49 | 0.063                       | 0.006                           | 0.086                      | 0.000                      | 4.435                           | 0.046                    |
| 50 | 0.000                       | 0.000                           | 0.000                      | 0.000                      | 0.000                           | 0.073                    |
| 51 | 0.115                       | 0.186                           | 0.036                      | 0.000                      | 0.000                           | 0.236                    |
| 52 | 0.000                       | 0.129                           | 0.000                      | 0.000                      | 0.050                           | 0.046                    |
| 53 | NA                          | NA                              | NA                         | NA                         | NA                              | NA                       |
| 54 | NA                          | NA                              | NA                         | NA                         | NA                              | NA                       |
| 55 | NA                          | NA                              | NA                         | NA                         | NA                              | NA                       |
| 56 | NA                          | NA                              | NA                         | NA                         | NA                              | NA                       |
| 57 | NA                          | NA                              | NA                         | NA                         | NA                              | NA                       |
| 58 | NA                          | NA                              | NA                         | NA                         | NA                              | NA                       |
| 59 | NA                          | NA                              | NA                         | NA                         | NA                              | NA                       |
| 60 | NA                          | NA                              | NA                         | NA                         | NA                              | NA                       |
| 61 | NA                          | NA                              | NA                         | NA                         | NA                              | NA                       |
| 62 | NA                          | NA                              | NA                         | NA                         | NA                              | NA                       |
| 63 | NA                          | NA                              | NA                         | NA                         | NA                              | NA                       |
| 64 | NA                          | NA                              | NA                         | NA                         | NA                              | NA                       |
| 65 | NA                          | NA                              | NA                         | NA                         | NA                              | NA                       |

Table S1.

| ID | <i>Anaerococcus tetradius</i> | <i>Peptostreptococcus anaerobius</i> | <i>Finegoldia magna</i> | <i>Prevotella genogroup 4</i> | <i>Peptoniphilus lacrimalis</i> |
|----|-------------------------------|--------------------------------------|-------------------------|-------------------------------|---------------------------------|
| 1  | 0.000                         | 0.000                                | 0.035                   | 0.000                         | 0.000                           |
| 2  | 0.009                         | 0.000                                | 0.059                   | 0.000                         | 0.000                           |
| 3  | 0.007                         | 0.000                                | 0.079                   | 0.000                         | 0.000                           |
| 4  | 0.000                         | 0.000                                | 0.018                   | 0.000                         | 0.000                           |
| 5  | 5.979                         | 0.000                                | 1.363                   | 0.000                         | 0.389                           |
| 6  | 1.446                         | 0.000                                | 1.228                   | 0.000                         | 0.102                           |
| 7  | 0.017                         | 0.009                                | 0.043                   | 0.000                         | 0.000                           |
| 8  | 0.000                         | 3.976                                | 0.000                   | 0.000                         | 0.000                           |
| 9  | 0.000                         | 0.000                                | 0.017                   | 0.000                         | 0.000                           |
| 10 | 0.015                         | 0.068                                | 0.075                   | 0.000                         | 0.000                           |
| 11 | 0.165                         | 0.018                                | 0.004                   | 0.004                         | 0.007                           |
| 12 | 0.000                         | 0.000                                | 0.037                   | 0.000                         | 0.828                           |
| 13 | 0.697                         | 0.090                                | 0.640                   | 0.000                         | 0.022                           |
| 14 | 0.000                         | 0.000                                | 0.018                   | 0.000                         | 0.000                           |
| 15 | 0.000                         | 0.000                                | 0.009                   | 0.000                         | 0.000                           |
| 16 | 0.010                         | 0.000                                | 0.044                   | 0.000                         | 0.000                           |
| 17 | 0.020                         | 0.000                                | 0.007                   | 0.000                         | 0.000                           |
| 18 | 0.005                         | 0.000                                | 0.005                   | 0.000                         | 0.000                           |
| 19 | 0.000                         | 0.000                                | 0.011                   | 0.000                         | 0.000                           |
| 20 | 0.000                         | 0.000                                | 0.030                   | 0.000                         | 0.000                           |
| 21 | 0.000                         | 0.000                                | 0.000                   | 0.000                         | 0.000                           |
| 22 | 0.000                         | 0.000                                | 0.000                   | 0.000                         | 0.000                           |
| 23 | 0.000                         | 0.000                                | 0.000                   | 0.000                         | 0.000                           |
| 24 | 0.007                         | 0.000                                | 0.000                   | 0.000                         | 0.000                           |
| 25 | 0.017                         | 0.000                                | 0.022                   | 0.000                         | 0.000                           |
| 26 | 0.011                         | 0.000                                | 0.000                   | 0.027                         | 0.016                           |
| 27 | 0.007                         | 0.000                                | 0.066                   | 0.000                         | 0.007                           |
| 28 | 0.021                         | 0.000                                | 0.000                   | 0.455                         | 0.069                           |
| 29 | 2.163                         | 0.000                                | 1.106                   | 0.000                         | 0.048                           |
| 30 | 0.048                         | 0.000                                | 0.000                   | 0.000                         | 0.097                           |
| 31 | 0.000                         | 0.000                                | 0.000                   | 0.000                         | 0.536                           |
| 32 | 0.019                         | 0.000                                | 0.007                   | 0.880                         | 1.050                           |
| 33 | 0.000                         | 0.000                                | 0.000                   | 0.000                         | 0.000                           |
| 34 | 0.021                         | 0.000                                | 0.068                   | 0.000                         | 0.000                           |
| 35 | 0.000                         | 0.000                                | 0.000                   | 0.723                         | 0.379                           |
| 36 | 0.000                         | 0.000                                | 0.000                   | 0.000                         | 0.000                           |
| 37 | 0.000                         | 0.000                                | 0.086                   | 0.016                         | 0.008                           |
| 38 | 0.000                         | 0.000                                | 0.000                   | 0.000                         | 0.000                           |
| 39 | 0.000                         | 0.000                                | 0.000                   | 0.000                         | 0.000                           |
| 40 | 0.005                         | 0.000                                | 0.000                   | 0.000                         | 0.000                           |
| 41 | 0.000                         | 0.000                                | 0.000                   | 0.000                         | 0.000                           |
| 42 | 0.919                         | 0.811                                | 1.016                   | 1.317                         | 0.190                           |
| 43 | 0.000                         | 0.000                                | 0.000                   | 0.000                         | 0.000                           |
| 44 | 0.000                         | 0.000                                | 0.000                   | 0.000                         | 0.000                           |
| 45 | 0.000                         | 0.000                                | 0.004                   | 0.000                         | 0.000                           |
| 46 | 0.000                         | 0.000                                | 0.000                   | 0.000                         | 0.000                           |
| 47 | 0.024                         | 0.000                                | 0.000                   | 0.000                         | 0.130                           |
| 48 | 0.000                         | 0.000                                | 0.000                   | 0.039                         | 0.058                           |
| 49 | 0.000                         | 0.000                                | 0.006                   | 0.000                         | 0.000                           |
| 50 | 0.000                         | 0.000                                | 0.000                   | 0.000                         | 0.000                           |
| 51 | 0.000                         | 0.000                                | 0.014                   | 0.000                         | 0.000                           |
| 52 | 0.004                         | 0.000                                | 0.027                   | 0.000                         | 0.000                           |
| 53 | NA                            | NA                                   | NA                      | NA                            | NA                              |
| 54 | NA                            | NA                                   | NA                      | NA                            | NA                              |
| 55 | NA                            | NA                                   | NA                      | NA                            | NA                              |
| 56 | NA                            | NA                                   | NA                      | NA                            | NA                              |
| 57 | NA                            | NA                                   | NA                      | NA                            | NA                              |
| 58 | NA                            | NA                                   | NA                      | NA                            | NA                              |
| 59 | NA                            | NA                                   | NA                      | NA                            | NA                              |
| 60 | NA                            | NA                                   | NA                      | NA                            | NA                              |
| 61 | NA                            | NA                                   | NA                      | NA                            | NA                              |
| 62 | NA                            | NA                                   | NA                      | NA                            | NA                              |
| 63 | NA                            | NA                                   | NA                      | NA                            | NA                              |
| 64 | NA                            | NA                                   | NA                      | NA                            | NA                              |
| 65 | NA                            | NA                                   | NA                      | NA                            | NA                              |



Table S1.

| ID | <i>Bacteroides uniformis</i> | <i>Serratia marcescens</i> | <i>Porphyromonas uenonis</i> | <i>Lactobacillus vaginalis</i> | <i>Peptoniphilus asaccharolyticus</i> |
|----|------------------------------|----------------------------|------------------------------|--------------------------------|---------------------------------------|
| 1  | 0.000                        | 0.089                      | 0.000                        | 0.372                          | 0.000                                 |
| 2  | 0.000                        | 0.064                      | 0.000                        | 0.000                          | 0.000                                 |
| 3  | 0.017                        | 0.083                      | 0.000                        | 0.000                          | 0.003                                 |
| 4  | 0.000                        | 0.054                      | 0.000                        | 1.431                          | 0.000                                 |
| 5  | 0.000                        | 0.028                      | 0.000                        | 0.083                          | 0.000                                 |
| 6  | 0.000                        | 0.109                      | 0.131                        | 0.051                          | 1.679                                 |
| 7  | 0.000                        | 0.103                      | 0.000                        | 0.000                          | 0.000                                 |
| 8  | 0.000                        | 0.083                      | 0.000                        | 0.000                          | 0.000                                 |
| 9  | 0.000                        | 0.087                      | 0.000                        | 1.199                          | 0.000                                 |
| 10 | 0.000                        | 0.098                      | 0.000                        | 0.332                          | 0.000                                 |
| 11 | 0.000                        | 0.059                      | 0.355                        | 0.000                          | 0.007                                 |
| 12 | 0.009                        | 0.009                      | 0.019                        | 0.000                          | 0.019                                 |
| 13 | 0.000                        | 0.032                      | 0.026                        | 0.000                          | 0.003                                 |
| 14 | 0.000                        | 0.105                      | 0.000                        | 0.000                          | 0.000                                 |
| 15 | 0.000                        | 0.036                      | 0.000                        | 0.009                          | 0.000                                 |
| 16 | 0.020                        | 0.138                      | 0.000                        | 0.000                          | 0.000                                 |
| 17 | 0.000                        | 0.073                      | 0.000                        | 0.546                          | 0.000                                 |
| 18 | 0.000                        | 0.026                      | 0.000                        | 0.000                          | 0.000                                 |
| 19 | 0.000                        | 0.091                      | 0.000                        | 0.997                          | 0.000                                 |
| 20 | 0.000                        | 0.127                      | 0.000                        | 0.246                          | 0.000                                 |
| 21 | 0.000                        | 0.022                      | 0.000                        | 0.000                          | 0.000                                 |
| 22 | 0.000                        | 0.115                      | 0.000                        | 0.000                          | 0.000                                 |
| 23 | 0.000                        | 3.390                      | 0.000                        | 0.000                          | 0.000                                 |
| 24 | 0.000                        | 0.085                      | 0.000                        | 0.000                          | 0.000                                 |
| 25 | 0.000                        | 0.133                      | 0.000                        | 0.000                          | 0.000                                 |
| 26 | 0.145                        | 0.005                      | 0.000                        | 0.000                          | 0.000                                 |
| 27 | 0.000                        | 0.114                      | 0.000                        | 0.000                          | 0.000                                 |
| 28 | 0.406                        | 0.028                      | 0.007                        | 0.000                          | 0.000                                 |
| 29 | 0.240                        | 0.577                      | 0.000                        | 0.000                          | 0.385                                 |
| 30 | 0.000                        | 0.005                      | 0.010                        | 0.000                          | 0.000                                 |
| 31 | 1.439                        | 0.011                      | 0.004                        | 0.000                          | 0.000                                 |
| 32 | 0.813                        | 0.007                      | 0.052                        | 0.000                          | 0.108                                 |
| 33 | 0.000                        | 0.285                      | 0.000                        | 0.000                          | 0.000                                 |
| 34 | 0.000                        | 0.124                      | 0.000                        | 0.004                          | 0.000                                 |
| 35 | 0.000                        | 0.000                      | 0.095                        | 0.000                          | 0.000                                 |
| 36 | 0.000                        | 0.091                      | 0.000                        | 0.005                          | 0.000                                 |
| 37 | 0.000                        | 0.029                      | 0.000                        | 0.000                          | 0.000                                 |
| 38 | 0.000                        | 0.000                      | 0.000                        | 0.000                          | 0.000                                 |
| 39 | 0.000                        | 0.019                      | 0.000                        | 0.000                          | 0.000                                 |
| 40 | 0.000                        | 0.094                      | 0.000                        | 0.338                          | 0.000                                 |
| 41 | 0.000                        | 0.040                      | 0.000                        | 0.000                          | 0.000                                 |
| 42 | 0.015                        | 0.026                      | 1.515                        | 0.000                          | 0.856                                 |
| 43 | 0.007                        | 0.218                      | 0.000                        | 0.000                          | 0.000                                 |
| 44 | 0.000                        | 0.064                      | 0.000                        | 0.000                          | 0.000                                 |
| 45 | 0.000                        | 0.013                      | 0.000                        | 0.000                          | 0.000                                 |
| 46 | 0.008                        | 0.107                      | 0.000                        | 0.000                          | 0.000                                 |
| 47 | 0.000                        | 0.012                      | 0.290                        | 0.000                          | 0.000                                 |
| 48 | 0.000                        | 0.019                      | 0.000                        | 0.000                          | 0.000                                 |
| 49 | 0.000                        | 0.213                      | 0.000                        | 0.000                          | 0.000                                 |
| 50 | 0.000                        | 0.050                      | 0.000                        | 0.062                          | 0.000                                 |
| 51 | 0.000                        | 0.415                      | 0.000                        | 0.000                          | 0.000                                 |
| 52 | 0.000                        | 0.034                      | 0.000                        | 0.000                          | 0.000                                 |
| 53 | NA                           | NA                         | NA                           | NA                             | NA                                    |
| 54 | NA                           | NA                         | NA                           | NA                             | NA                                    |
| 55 | NA                           | NA                         | NA                           | NA                             | NA                                    |
| 56 | NA                           | NA                         | NA                           | NA                             | NA                                    |
| 57 | NA                           | NA                         | NA                           | NA                             | NA                                    |
| 58 | NA                           | NA                         | NA                           | NA                             | NA                                    |
| 59 | NA                           | NA                         | NA                           | NA                             | NA                                    |
| 60 | NA                           | NA                         | NA                           | NA                             | NA                                    |
| 61 | NA                           | NA                         | NA                           | NA                             | NA                                    |
| 62 | NA                           | NA                         | NA                           | NA                             | NA                                    |
| 63 | NA                           | NA                         | NA                           | NA                             | NA                                    |
| 64 | NA                           | NA                         | NA                           | NA                             | NA                                    |
| 65 | NA                           | NA                         | NA                           | NA                             | NA                                    |

Table S1.

| ID | <i>Arcanobacterium hippocoleae</i> | <i>Actinomyces neuii</i> | <i>Veillonella parvula</i> | <i>Lactobacillus coleohominis</i> | <i>Howardella ureilytica</i> |
|----|------------------------------------|--------------------------|----------------------------|-----------------------------------|------------------------------|
| 1  | 0.000                              | 0.000                    | 0.000                      | 0.071                             | 0.000                        |
| 2  | 0.000                              | 0.009                    | 0.009                      | 0.136                             | 0.000                        |
| 3  | 0.000                              | 0.000                    | 0.003                      | 0.000                             | 0.003                        |
| 4  | 0.000                              | 0.000                    | 0.054                      | 0.000                             | 0.000                        |
| 5  | 0.028                              | 0.139                    | 0.000                      | 0.000                             | 0.111                        |
| 6  | 0.821                              | 0.000                    | 0.007                      | 0.000                             | 0.000                        |
| 7  | 0.000                              | 0.000                    | 0.000                      | 0.000                             | 0.000                        |
| 8  | 0.000                              | 0.000                    | 0.000                      | 0.000                             | 0.530                        |
| 9  | 0.000                              | 0.000                    | 0.000                      | 0.000                             | 0.000                        |
| 10 | 0.008                              | 0.000                    | 0.000                      | 0.000                             | 0.000                        |
| 11 | 0.000                              | 0.000                    | 0.000                      | 0.000                             | 0.029                        |
| 12 | 0.000                              | 0.028                    | 0.000                      | 0.000                             | 0.028                        |
| 13 | 0.000                              | 0.000                    | 0.000                      | 0.000                             | 0.003                        |
| 14 | 0.000                              | 0.009                    | 0.000                      | 1.902                             | 0.000                        |
| 15 | 0.000                              | 0.000                    | 0.000                      | 1.427                             | 0.000                        |
| 16 | 0.010                              | 0.000                    | 0.000                      | 0.000                             | 0.000                        |
| 17 | 0.007                              | 0.000                    | 0.000                      | 0.000                             | 0.000                        |
| 18 | 0.000                              | 0.000                    | 0.000                      | 0.005                             | 0.000                        |
| 19 | 0.000                              | 0.000                    | 0.000                      | 0.000                             | 0.000                        |
| 20 | 0.000                              | 0.000                    | 0.000                      | 0.000                             | 0.000                        |
| 21 | 0.000                              | 0.000                    | 0.000                      | 0.000                             | 0.000                        |
| 22 | 0.000                              | 0.000                    | 0.000                      | 0.000                             | 0.000                        |
| 23 | 0.000                              | 0.000                    | 0.000                      | 0.000                             | 0.000                        |
| 24 | 0.113                              | 0.000                    | 0.000                      | 0.000                             | 0.000                        |
| 25 | 0.017                              | 0.000                    | 0.000                      | 0.000                             | 0.000                        |
| 26 | 0.011                              | 0.000                    | 0.000                      | 0.000                             | 0.000                        |
| 27 | 0.004                              | 0.044                    | 0.000                      | 0.000                             | 0.004                        |
| 28 | 0.028                              | 0.000                    | 0.000                      | 0.000                             | 0.007                        |
| 29 | 0.817                              | 0.192                    | 0.096                      | 0.000                             | 0.000                        |
| 30 | 0.000                              | 0.000                    | 0.000                      | 0.000                             | 0.000                        |
| 31 | 0.083                              | 0.000                    | 0.000                      | 0.000                             | 0.000                        |
| 32 | 0.019                              | 0.000                    | 0.000                      | 0.000                             | 0.011                        |
| 33 | 0.000                              | 0.000                    | 0.000                      | 0.000                             | 0.000                        |
| 34 | 0.000                              | 0.000                    | 0.000                      | 0.000                             | 0.000                        |
| 35 | 0.000                              | 0.000                    | 0.000                      | 0.000                             | 0.026                        |
| 36 | 0.000                              | 0.000                    | 0.000                      | 0.000                             | 0.000                        |
| 37 | 0.261                              | 1.813                    | 1.666                      | 0.000                             | 0.457                        |
| 38 | 0.000                              | 0.000                    | 0.000                      | 0.000                             | 0.000                        |
| 39 | 0.000                              | 0.000                    | 0.000                      | 0.000                             | 0.000                        |
| 40 | 0.010                              | 0.000                    | 0.005                      | 0.000                             | 0.000                        |
| 41 | 0.000                              | 0.000                    | 0.000                      | 0.000                             | 0.726                        |
| 42 | 0.264                              | 0.000                    | 0.004                      | 0.000                             | 0.186                        |
| 43 | 0.000                              | 0.000                    | 0.000                      | 0.000                             | 0.000                        |
| 44 | 0.000                              | 0.000                    | 0.000                      | 0.000                             | 0.000                        |
| 45 | 0.000                              | 0.000                    | 0.000                      | 0.000                             | 0.000                        |
| 46 | 0.000                              | 0.000                    | 0.000                      | 0.000                             | 0.000                        |
| 47 | 0.414                              | 0.000                    | 0.000                      | 0.000                             | 0.024                        |
| 48 | 0.039                              | 0.000                    | 0.000                      | 0.000                             | 0.000                        |
| 49 | 0.000                              | 0.046                    | 0.098                      | 0.000                             | 0.161                        |
| 50 | 0.000                              | 0.000                    | 0.000                      | 0.000                             | 0.000                        |
| 51 | 0.000                              | 0.000                    | 0.000                      | 0.000                             | 0.000                        |
| 52 | 0.000                              | 0.000                    | 0.004                      | 0.000                             | 0.000                        |
| 53 | NA                                 | NA                       | NA                         | NA                                | NA                           |
| 54 | NA                                 | NA                       | NA                         | NA                                | NA                           |
| 55 | NA                                 | NA                       | NA                         | NA                                | NA                           |
| 56 | NA                                 | NA                       | NA                         | NA                                | NA                           |
| 57 | NA                                 | NA                       | NA                         | NA                                | NA                           |
| 58 | NA                                 | NA                       | NA                         | NA                                | NA                           |
| 59 | NA                                 | NA                       | NA                         | NA                                | NA                           |
| 60 | NA                                 | NA                       | NA                         | NA                                | NA                           |
| 61 | NA                                 | NA                       | NA                         | NA                                | NA                           |
| 62 | NA                                 | NA                       | NA                         | NA                                | NA                           |
| 63 | NA                                 | NA                       | NA                         | NA                                | NA                           |
| 64 | NA                                 | NA                       | NA                         | NA                                | NA                           |
| 65 | NA                                 | NA                       | NA                         | NA                                | NA                           |

Table S1.

| ID | <i>Varibaculum cambriense</i> | <i>Actinomyces urogenitalis</i> | <i>Streptococcus oralis</i> | <i>Atopobium minutum</i> | <i>Campylobacter ureolyticus</i> |
|----|-------------------------------|---------------------------------|-----------------------------|--------------------------|----------------------------------|
| 1  | 0.000                         | 0.000                           | 0.000                       | 0.000                    | 0.000                            |
| 2  | 0.005                         | 0.005                           | 0.009                       | 0.000                    | 0.000                            |
| 3  | 0.003                         | 0.000                           | 0.017                       | 0.000                    | 0.000                            |
| 4  | 0.000                         | 0.000                           | 0.181                       | 0.000                    | 0.000                            |
| 5  | 0.000                         | 0.000                           | 0.000                       | 1.808                    | 0.000                            |
| 6  | 2.166                         | 0.247                           | 0.000                       | 0.073                    | 1.199                            |
| 7  | 0.000                         | 0.000                           | 0.000                       | 0.000                    | 0.000                            |
| 8  | 0.000                         | 0.000                           | 0.000                       | 0.000                    | 0.000                            |
| 9  | 0.000                         | 0.000                           | 0.000                       | 0.000                    | 0.000                            |
| 10 | 0.008                         | 0.000                           | 0.008                       | 0.000                    | 0.000                            |
| 11 | 0.000                         | 0.000                           | 0.000                       | 0.059                    | 0.011                            |
| 12 | 0.009                         | 0.000                           | 0.000                       | 0.009                    | 0.000                            |
| 13 | 0.000                         | 0.010                           | 0.006                       | 0.000                    | 0.003                            |
| 14 | 0.000                         | 0.000                           | 0.000                       | 0.000                    | 0.000                            |
| 15 | 0.000                         | 0.000                           | 0.018                       | 0.000                    | 0.000                            |
| 16 | 0.000                         | 0.000                           | 0.000                       | 0.000                    | 0.000                            |
| 17 | 0.007                         | 0.000                           | 0.000                       | 0.000                    | 0.000                            |
| 18 | 0.000                         | 0.000                           | 0.000                       | 0.000                    | 0.000                            |
| 19 | 0.000                         | 0.000                           | 0.023                       | 0.000                    | 0.000                            |
| 20 | 0.000                         | 0.000                           | 0.000                       | 0.000                    | 0.000                            |
| 21 | 0.000                         | 0.000                           | 0.022                       | 0.000                    | 0.000                            |
| 22 | 0.000                         | 0.000                           | 0.000                       | 0.000                    | 0.000                            |
| 23 | 0.000                         | 0.000                           | 0.000                       | 0.000                    | 0.000                            |
| 24 | 0.007                         | 0.014                           | 0.000                       | 0.000                    | 0.000                            |
| 25 | 0.006                         | 0.000                           | 0.000                       | 0.000                    | 0.000                            |
| 26 | 0.000                         | 0.043                           | 0.000                       | 0.016                    | 0.000                            |
| 27 | 0.000                         | 0.000                           | 0.000                       | 0.033                    | 0.000                            |
| 28 | 0.000                         | 0.138                           | 0.000                       | 0.062                    | 0.007                            |
| 29 | 0.096                         | 0.288                           | 1.731                       | 0.000                    | 0.337                            |
| 30 | 0.010                         | 0.131                           | 0.005                       | 0.097                    | 0.000                            |
| 31 | 0.000                         | 0.094                           | 0.000                       | 0.011                    | 0.000                            |
| 32 | 0.004                         | 0.108                           | 0.000                       | 0.100                    | 0.004                            |
| 33 | 0.000                         | 0.000                           | 0.000                       | 0.000                    | 0.000                            |
| 34 | 0.000                         | 0.000                           | 0.000                       | 0.004                    | 0.000                            |
| 35 | 0.000                         | 0.000                           | 0.000                       | 0.043                    | 0.009                            |
| 36 | 0.000                         | 0.000                           | 0.000                       | 0.000                    | 0.000                            |
| 37 | 0.000                         | 0.000                           | 0.000                       | 0.004                    | 0.000                            |
| 38 | 0.000                         | 0.000                           | 0.000                       | 0.000                    | 0.000                            |
| 39 | 0.000                         | 0.000                           | 0.000                       | 0.000                    | 0.000                            |
| 40 | 0.000                         | 0.005                           | 0.889                       | 0.000                    | 0.000                            |
| 41 | 0.000                         | 0.000                           | 0.000                       | 0.000                    | 0.000                            |
| 42 | 0.086                         | 0.007                           | 0.004                       | 0.138                    | 0.182                            |
| 43 | 0.000                         | 0.000                           | 0.000                       | 0.000                    | 0.000                            |
| 44 | 0.000                         | 0.000                           | 0.000                       | 0.000                    | 0.000                            |
| 45 | 0.000                         | 0.000                           | 0.009                       | 0.000                    | 0.000                            |
| 46 | 0.000                         | 0.000                           | 0.000                       | 0.000                    | 0.000                            |
| 47 | 0.000                         | 0.000                           | 0.000                       | 0.024                    | 0.000                            |
| 48 | 0.000                         | 0.039                           | 0.000                       | 0.097                    | 0.000                            |
| 49 | 0.000                         | 0.000                           | 0.000                       | 0.000                    | 0.000                            |
| 50 | 0.000                         | 0.000                           | 0.000                       | 0.000                    | 0.000                            |
| 51 | 0.000                         | 0.007                           | 0.000                       | 0.014                    | 0.000                            |
| 52 | 0.000                         | 0.000                           | 0.050                       | 0.000                    | 0.000                            |
| 53 | NA                            | NA                              | NA                          | NA                       | NA                               |
| 54 | NA                            | NA                              | NA                          | NA                       | NA                               |
| 55 | NA                            | NA                              | NA                          | NA                       | NA                               |
| 56 | NA                            | NA                              | NA                          | NA                       | NA                               |
| 57 | NA                            | NA                              | NA                          | NA                       | NA                               |
| 58 | NA                            | NA                              | NA                          | NA                       | NA                               |
| 59 | NA                            | NA                              | NA                          | NA                       | NA                               |
| 60 | NA                            | NA                              | NA                          | NA                       | NA                               |
| 61 | NA                            | NA                              | NA                          | NA                       | NA                               |
| 62 | NA                            | NA                              | NA                          | NA                       | NA                               |
| 63 | NA                            | NA                              | NA                          | NA                       | NA                               |
| 64 | NA                            | NA                              | NA                          | NA                       | NA                               |
| 65 | NA                            | NA                              | NA                          | NA                       | NA                               |

Table S1.

| ID | <i>Prevotella</i> genogroup 7 | <i>Anaerococcus vaginalis</i> | <i>Megasphaera</i> sp. type 2 | <i>Prevotella</i> genogroup 5 | <i>Alloscardovia omnicolens</i> |
|----|-------------------------------|-------------------------------|-------------------------------|-------------------------------|---------------------------------|
| 1  | 0.000                         | 0.000                         | 0.000                         | 0.000                         | 0.000                           |
| 2  | 0.000                         | 0.005                         | 0.000                         | 0.000                         | 0.000                           |
| 3  | 0.000                         | 0.000                         | 0.000                         | 0.000                         | 0.003                           |
| 4  | 0.000                         | 0.000                         | 0.000                         | 0.000                         | 0.018                           |
| 5  | 1.196                         | 0.000                         | 0.028                         | 0.000                         | 0.000                           |
| 6  | 0.029                         | 1.047                         | 0.000                         | 0.022                         | 1.236                           |
| 7  | 0.000                         | 0.000                         | 0.000                         | 0.000                         | 0.000                           |
| 8  | 0.000                         | 0.006                         | 0.000                         | 0.026                         | 0.000                           |
| 9  | 0.000                         | 0.000                         | 0.000                         | 0.000                         | 0.000                           |
| 10 | 0.000                         | 0.008                         | 0.000                         | 0.000                         | 0.000                           |
| 11 | 0.004                         | 0.000                         | 0.000                         | 0.026                         | 0.007                           |
| 12 | 0.670                         | 0.000                         | 0.009                         | 0.019                         | 0.000                           |
| 13 | 0.010                         | 0.010                         | 0.000                         | 0.006                         | 0.000                           |
| 14 | 0.000                         | 0.009                         | 0.000                         | 0.000                         | 0.000                           |
| 15 | 0.000                         | 0.000                         | 0.000                         | 0.000                         | 0.000                           |
| 16 | 0.000                         | 0.000                         | 0.000                         | 0.000                         | 0.000                           |
| 17 | 0.000                         | 0.000                         | 0.000                         | 0.020                         | 0.007                           |
| 18 | 0.000                         | 0.010                         | 0.000                         | 0.000                         | 0.000                           |
| 19 | 0.000                         | 0.000                         | 0.000                         | 0.000                         | 0.000                           |
| 20 | 0.000                         | 0.000                         | 0.000                         | 0.000                         | 0.000                           |
| 21 | 0.000                         | 0.000                         | 0.000                         | 0.000                         | 0.000                           |
| 22 | 0.000                         | 0.000                         | 0.000                         | 0.000                         | 0.000                           |
| 23 | 0.000                         | 0.000                         | 0.000                         | 0.000                         | 0.000                           |
| 24 | 0.000                         | 0.000                         | 0.000                         | 0.000                         | 0.000                           |
| 25 | 0.000                         | 0.006                         | 0.000                         | 0.000                         | 0.000                           |
| 26 | 0.000                         | 0.000                         | 0.000                         | 0.113                         | 0.011                           |
| 27 | 0.000                         | 0.055                         | 0.000                         | 0.000                         | 0.000                           |
| 28 | 0.000                         | 0.000                         | 0.269                         | 0.014                         | 0.000                           |
| 29 | 0.048                         | 0.144                         | 0.000                         | 0.000                         | 0.000                           |
| 30 | 0.005                         | 0.000                         | 0.000                         | 0.010                         | 0.019                           |
| 31 | 0.014                         | 0.000                         | 0.188                         | 0.069                         | 0.000                           |
| 32 | 0.000                         | 0.000                         | 0.000                         | 0.033                         | 0.007                           |
| 33 | 0.000                         | 0.000                         | 0.000                         | 0.000                         | 0.000                           |
| 34 | 0.000                         | 0.004                         | 0.000                         | 0.000                         | 0.000                           |
| 35 | 0.482                         | 0.000                         | 0.637                         | 0.077                         | 0.000                           |
| 36 | 0.000                         | 0.000                         | 0.000                         | 0.000                         | 0.000                           |
| 37 | 0.004                         | 0.008                         | 0.000                         | 0.392                         | 0.000                           |
| 38 | 0.000                         | 0.000                         | 0.000                         | 0.000                         | 0.000                           |
| 39 | 0.000                         | 0.000                         | 0.000                         | 0.000                         | 0.000                           |
| 40 | 0.000                         | 0.000                         | 0.000                         | 0.000                         | 0.000                           |
| 41 | 0.000                         | 0.000                         | 0.000                         | 0.000                         | 0.000                           |
| 42 | 0.093                         | 0.108                         | 0.011                         | 0.030                         | 0.015                           |
| 43 | 0.000                         | 0.000                         | 0.000                         | 0.000                         | 0.000                           |
| 44 | 0.000                         | 0.000                         | 0.000                         | 0.000                         | 0.000                           |
| 45 | 0.000                         | 0.000                         | 0.000                         | 0.000                         | 0.004                           |
| 46 | 0.000                         | 0.000                         | 0.000                         | 0.000                         | 0.000                           |
| 47 | 0.000                         | 0.000                         | 0.213                         | 0.012                         | 0.006                           |
| 48 | 0.000                         | 0.000                         | 0.000                         | 0.000                         | 0.000                           |
| 49 | 0.000                         | 0.035                         | 0.000                         | 0.000                         | 0.000                           |
| 50 | 0.000                         | 0.000                         | 0.000                         | 0.000                         | 0.000                           |
| 51 | 0.000                         | 0.000                         | 0.000                         | 0.000                         | 0.000                           |
| 52 | 0.000                         | 0.000                         | 0.000                         | 0.000                         | 0.000                           |
| 53 | NA                            | NA                            | NA                            | NA                            | NA                              |
| 54 | NA                            | NA                            | NA                            | NA                            | NA                              |
| 55 | NA                            | NA                            | NA                            | NA                            | NA                              |
| 56 | NA                            | NA                            | NA                            | NA                            | NA                              |
| 57 | NA                            | NA                            | NA                            | NA                            | NA                              |
| 58 | NA                            | NA                            | NA                            | NA                            | NA                              |
| 59 | NA                            | NA                            | NA                            | NA                            | NA                              |
| 60 | NA                            | NA                            | NA                            | NA                            | NA                              |
| 61 | NA                            | NA                            | NA                            | NA                            | NA                              |
| 62 | NA                            | NA                            | NA                            | NA                            | NA                              |
| 63 | NA                            | NA                            | NA                            | NA                            | NA                              |
| 64 | NA                            | NA                            | NA                            | NA                            | NA                              |
| 65 | NA                            | NA                            | NA                            | NA                            | NA                              |

Table S1.

| ID | <i>Pediococcus acidilactici</i> | <i>Peptoniphilus indolicus</i> | <i>Dialister sp. type 3</i> | <i>Staphylococcus haemolyticus</i> | <i>Clostridium colicanis</i> |
|----|---------------------------------|--------------------------------|-----------------------------|------------------------------------|------------------------------|
| 1  | 0.000                           | 0.000                          | 0.000                       | 0.000                              | 0.000                        |
| 2  | 0.009                           | 0.000                          | 0.000                       | 0.005                              | 0.000                        |
| 3  | 0.003                           | 0.003                          | 0.003                       | 0.000                              | 0.017                        |
| 4  | 0.000                           | 0.000                          | 0.000                       | 0.000                              | 0.000                        |
| 5  | 0.000                           | 0.250                          | 0.000                       | 0.000                              | 0.000                        |
| 6  | 0.015                           | 0.145                          | 0.000                       | 0.000                              | 0.022                        |
| 7  | 0.000                           | 0.000                          | 0.000                       | 0.000                              | 0.000                        |
| 8  | 0.000                           | 0.000                          | 0.000                       | 0.191                              | 0.000                        |
| 9  | 0.009                           | 0.000                          | 0.000                       | 0.000                              | 0.000                        |
| 10 | 0.015                           | 0.000                          | 0.000                       | 0.008                              | 0.000                        |
| 11 | 0.000                           | 0.051                          | 0.000                       | 0.000                              | 0.000                        |
| 12 | 0.000                           | 0.000                          | 0.019                       | 0.000                              | 0.009                        |
| 13 | 0.003                           | 0.042                          | 0.000                       | 0.000                              | 0.000                        |
| 14 | 0.009                           | 0.000                          | 0.000                       | 0.000                              | 0.000                        |
| 15 | 0.000                           | 0.000                          | 0.000                       | 0.000                              | 0.000                        |
| 16 | 0.003                           | 0.003                          | 0.000                       | 0.003                              | 0.003                        |
| 17 | 0.007                           | 0.000                          | 0.000                       | 0.000                              | 0.786                        |
| 18 | 0.000                           | 0.000                          | 0.000                       | 0.000                              | 0.000                        |
| 19 | 0.034                           | 0.000                          | 0.000                       | 0.000                              | 0.000                        |
| 20 | 0.015                           | 0.000                          | 0.000                       | 0.022                              | 0.000                        |
| 21 | 0.000                           | 0.000                          | 0.000                       | 0.000                              | 0.000                        |
| 22 | 0.016                           | 0.000                          | 0.000                       | 0.000                              | 0.000                        |
| 23 | 0.000                           | 0.000                          | 0.000                       | 0.000                              | 0.000                        |
| 24 | 0.021                           | 0.007                          | 0.000                       | 0.007                              | 0.000                        |
| 25 | 0.011                           | 0.006                          | 0.000                       | 0.000                              | 0.000                        |
| 26 | 0.005                           | 0.000                          | 0.000                       | 0.005                              | 0.000                        |
| 27 | 0.007                           | 0.011                          | 0.000                       | 0.011                              | 0.000                        |
| 28 | 0.000                           | 0.007                          | 0.000                       | 0.000                              | 0.007                        |
| 29 | 0.048                           | 0.144                          | 0.000                       | 4.231                              | 0.000                        |
| 30 | 0.005                           | 0.000                          | 0.000                       | 0.005                              | 0.019                        |
| 31 | 0.000                           | 0.014                          | 0.000                       | 0.000                              | 0.000                        |
| 32 | 0.000                           | 0.015                          | 0.000                       | 0.000                              | 0.007                        |
| 33 | 0.011                           | 0.000                          | 0.000                       | 0.000                              | 0.000                        |
| 34 | 0.021                           | 0.000                          | 0.000                       | 0.004                              | 0.000                        |
| 35 | 0.000                           | 0.000                          | 0.000                       | 0.000                              | 0.000                        |
| 36 | 0.038                           | 0.000                          | 0.000                       | 0.000                              | 0.000                        |
| 37 | 0.000                           | 0.000                          | 0.621                       | 0.000                              | 0.000                        |
| 38 | 0.000                           | 0.000                          | 0.000                       | 0.000                              | 0.000                        |
| 39 | 0.025                           | 0.000                          | 0.000                       | 0.000                              | 0.000                        |
| 40 | 0.030                           | 0.000                          | 0.000                       | 0.000                              | 0.000                        |
| 41 | 0.000                           | 0.000                          | 0.000                       | 0.000                              | 0.000                        |
| 42 | 0.000                           | 0.313                          | 0.026                       | 0.045                              | 0.000                        |
| 43 | 0.036                           | 0.000                          | 0.000                       | 0.000                              | 0.000                        |
| 44 | 0.009                           | 0.000                          | 0.000                       | 0.000                              | 0.000                        |
| 45 | 0.030                           | 0.004                          | 0.000                       | 0.000                              | 0.000                        |
| 46 | 0.000                           | 0.000                          | 0.000                       | 0.000                              | 0.000                        |
| 47 | 0.000                           | 0.000                          | 0.000                       | 0.000                              | 0.000                        |
| 48 | 0.000                           | 0.000                          | 0.000                       | 0.000                              | 0.000                        |
| 49 | 0.633                           | 0.000                          | 0.000                       | 0.000                              | 0.000                        |
| 50 | 0.017                           | 0.000                          | 0.000                       | 0.000                              | 0.000                        |
| 51 | 0.000                           | 0.007                          | 0.000                       | 0.000                              | 0.000                        |
| 52 | 0.023                           | 0.004                          | 0.000                       | 0.011                              | 0.000                        |
| 53 | NA                              | NA                             | NA                          | NA                                 | NA                           |
| 54 | NA                              | NA                             | NA                          | NA                                 | NA                           |
| 55 | NA                              | NA                             | NA                          | NA                                 | NA                           |
| 56 | NA                              | NA                             | NA                          | NA                                 | NA                           |
| 57 | NA                              | NA                             | NA                          | NA                                 | NA                           |
| 58 | NA                              | NA                             | NA                          | NA                                 | NA                           |
| 59 | NA                              | NA                             | NA                          | NA                                 | NA                           |
| 60 | NA                              | NA                             | NA                          | NA                                 | NA                           |
| 61 | NA                              | NA                             | NA                          | NA                                 | NA                           |
| 62 | NA                              | NA                             | NA                          | NA                                 | NA                           |
| 63 | NA                              | NA                             | NA                          | NA                                 | NA                           |
| 64 | NA                              | NA                             | NA                          | NA                                 | NA                           |
| 65 | NA                              | NA                             | NA                          | NA                                 | NA                           |

Table S1.

| ID | <i>Peptostreptococcus stomatis</i> | <i>Veillonella montpellierensis</i> | <i>Dialister propionicifaciens</i> | <i>Aerococcus viridans</i> | <i>Porphyromonas endodontalis</i> |
|----|------------------------------------|-------------------------------------|------------------------------------|----------------------------|-----------------------------------|
| 1  | 0.000                              | 0.000                               | 0.000                              | 0.000                      | 0.000                             |
| 2  | 0.000                              | 0.000                               | 0.000                              | 0.009                      | 0.000                             |
| 3  | 0.003                              | 0.000                               | 0.000                              | 0.010                      | 0.000                             |
| 4  | 0.000                              | 0.000                               | 0.000                              | 0.000                      | 0.000                             |
| 5  | 0.000                              | 0.000                               | 0.028                              | 0.000                      | 0.000                             |
| 6  | 0.000                              | 0.000                               | 0.058                              | 0.022                      | 0.000                             |
| 7  | 0.000                              | 0.000                               | 0.000                              | 0.000                      | 0.000                             |
| 8  | 0.000                              | 0.000                               | 0.000                              | 0.000                      | 0.000                             |
| 9  | 0.000                              | 0.000                               | 0.000                              | 0.000                      | 0.000                             |
| 10 | 0.000                              | 0.000                               | 0.000                              | 0.000                      | 0.000                             |
| 11 | 0.000                              | 0.000                               | 0.000                              | 0.004                      | 0.022                             |
| 12 | 0.242                              | 0.009                               | 0.000                              | 0.000                      | 0.056                             |
| 13 | 0.000                              | 0.240                               | 0.029                              | 0.000                      | 0.000                             |
| 14 | 0.000                              | 0.000                               | 0.000                              | 0.000                      | 0.000                             |
| 15 | 0.000                              | 0.000                               | 0.000                              | 0.000                      | 0.000                             |
| 16 | 0.000                              | 0.003                               | 0.000                              | 0.003                      | 0.000                             |
| 17 | 0.007                              | 0.000                               | 0.000                              | 0.007                      | 0.000                             |
| 18 | 0.000                              | 0.000                               | 0.000                              | 0.000                      | 0.000                             |
| 19 | 0.000                              | 0.000                               | 0.000                              | 0.000                      | 0.000                             |
| 20 | 0.000                              | 0.000                               | 0.000                              | 0.000                      | 0.000                             |
| 21 | 0.000                              | 0.000                               | 0.000                              | 0.000                      | 0.000                             |
| 22 | 0.000                              | 0.000                               | 0.000                              | 0.000                      | 0.000                             |
| 23 | 0.000                              | 0.000                               | 0.000                              | 0.000                      | 0.000                             |
| 24 | 0.000                              | 0.000                               | 0.000                              | 0.000                      | 0.000                             |
| 25 | 0.000                              | 0.000                               | 0.000                              | 0.006                      | 0.000                             |
| 26 | 0.000                              | 0.000                               | 0.000                              | 0.016                      | 0.000                             |
| 27 | 0.000                              | 0.000                               | 0.000                              | 0.000                      | 0.000                             |
| 28 | 0.000                              | 0.000                               | 0.000                              | 0.000                      | 0.007                             |
| 29 | 0.000                              | 0.000                               | 0.000                              | 1.683                      | 0.000                             |
| 30 | 0.000                              | 0.000                               | 0.000                              | 0.000                      | 0.000                             |
| 31 | 0.000                              | 0.000                               | 0.000                              | 0.000                      | 0.000                             |
| 32 | 0.000                              | 0.000                               | 0.000                              | 0.000                      | 0.234                             |
| 33 | 0.000                              | 0.000                               | 0.000                              | 0.004                      | 0.000                             |
| 34 | 0.000                              | 0.000                               | 0.000                              | 0.000                      | 0.000                             |
| 35 | 0.533                              | 0.000                               | 0.000                              | 0.009                      | 0.000                             |
| 36 | 0.000                              | 0.005                               | 0.000                              | 0.000                      | 0.000                             |
| 37 | 0.000                              | 0.000                               | 0.176                              | 0.000                      | 0.004                             |
| 38 | 0.000                              | 0.000                               | 0.000                              | 0.000                      | 0.000                             |
| 39 | 0.000                              | 0.000                               | 0.000                              | 0.000                      | 0.000                             |
| 40 | 0.000                              | 0.050                               | 0.000                              | 0.005                      | 0.000                             |
| 41 | 0.000                              | 0.000                               | 0.000                              | 0.000                      | 0.000                             |
| 42 | 0.071                              | 0.000                               | 0.138                              | 0.060                      | 0.011                             |
| 43 | 0.000                              | 0.015                               | 0.000                              | 0.007                      | 0.000                             |
| 44 | 0.000                              | 0.032                               | 0.000                              | 0.000                      | 0.000                             |
| 45 | 0.000                              | 0.000                               | 0.000                              | 0.000                      | 0.000                             |
| 46 | 0.000                              | 0.000                               | 0.000                              | 0.000                      | 0.000                             |
| 47 | 0.000                              | 0.000                               | 0.000                              | 0.024                      | 0.000                             |
| 48 | 0.000                              | 0.000                               | 0.000                              | 0.000                      | 0.000                             |
| 49 | 0.000                              | 0.000                               | 0.000                              | 0.000                      | 0.000                             |
| 50 | 0.000                              | 0.000                               | 0.000                              | 0.000                      | 0.000                             |
| 51 | 0.000                              | 0.000                               | 0.000                              | 0.000                      | 0.000                             |
| 52 | 0.004                              | 0.000                               | 0.000                              | 0.000                      | 0.000                             |
| 53 | NA                                 | NA                                  | NA                                 | NA                         | NA                                |
| 54 | NA                                 | NA                                  | NA                                 | NA                         | NA                                |
| 55 | NA                                 | NA                                  | NA                                 | NA                         | NA                                |
| 56 | NA                                 | NA                                  | NA                                 | NA                         | NA                                |
| 57 | NA                                 | NA                                  | NA                                 | NA                         | NA                                |
| 58 | NA                                 | NA                                  | NA                                 | NA                         | NA                                |
| 59 | NA                                 | NA                                  | NA                                 | NA                         | NA                                |
| 60 | NA                                 | NA                                  | NA                                 | NA                         | NA                                |
| 61 | NA                                 | NA                                  | NA                                 | NA                         | NA                                |
| 62 | NA                                 | NA                                  | NA                                 | NA                         | NA                                |
| 63 | NA                                 | NA                                  | NA                                 | NA                         | NA                                |
| 64 | NA                                 | NA                                  | NA                                 | NA                         | NA                                |
| 65 | NA                                 | NA                                  | NA                                 | NA                         | NA                                |

Table S1.

| ID | <i>Bifidobacterium longum</i> | <i>Roseburia faecis</i> | <i>Arcanobacterium phocae</i> | <i>Streptococcus parasanguinis</i> | <i>Staphylococcus epidermidis</i> |
|----|-------------------------------|-------------------------|-------------------------------|------------------------------------|-----------------------------------|
| 1  | 0.000                         | 0.000                   | 0.000                         | 0.000                              | 0.000                             |
| 2  | 0.000                         | 0.000                   | 0.005                         | 0.000                              | 0.000                             |
| 3  | 0.003                         | 0.076                   | 0.000                         | 0.010                              | 0.000                             |
| 4  | 0.000                         | 0.000                   | 0.000                         | 0.036                              | 0.036                             |
| 5  | 0.000                         | 0.000                   | 0.000                         | 0.000                              | 0.000                             |
| 6  | 0.458                         | 0.000                   | 0.116                         | 0.000                              | 0.000                             |
| 7  | 0.000                         | 0.000                   | 0.000                         | 0.000                              | 0.000                             |
| 8  | 0.000                         | 0.000                   | 0.000                         | 0.000                              | 0.045                             |
| 9  | 0.000                         | 0.000                   | 0.000                         | 0.000                              | 0.017                             |
| 10 | 0.000                         | 0.000                   | 0.000                         | 0.000                              | 0.000                             |
| 11 | 0.000                         | 0.000                   | 0.000                         | 0.000                              | 0.000                             |
| 12 | 0.000                         | 0.000                   | 0.000                         | 0.000                              | 0.019                             |
| 13 | 0.000                         | 0.000                   | 0.000                         | 0.000                              | 0.000                             |
| 14 | 0.000                         | 0.000                   | 0.000                         | 0.000                              | 0.000                             |
| 15 | 0.000                         | 0.000                   | 0.009                         | 0.009                              | 0.045                             |
| 16 | 0.017                         | 0.037                   | 0.000                         | 0.000                              | 0.000                             |
| 17 | 0.000                         | 0.027                   | 0.000                         | 0.000                              | 0.000                             |
| 18 | 0.000                         | 0.000                   | 0.000                         | 0.000                              | 0.000                             |
| 19 | 0.000                         | 0.000                   | 0.000                         | 0.000                              | 0.011                             |
| 20 | 0.000                         | 0.000                   | 0.000                         | 0.000                              | 0.000                             |
| 21 | 0.000                         | 0.000                   | 0.000                         | 0.000                              | 0.000                             |
| 22 | 0.000                         | 0.000                   | 0.000                         | 0.000                              | 0.000                             |
| 23 | 0.000                         | 0.000                   | 0.000                         | 0.000                              | 0.000                             |
| 24 | 0.000                         | 0.000                   | 0.042                         | 0.000                              | 0.000                             |
| 25 | 0.000                         | 0.000                   | 0.000                         | 0.000                              | 0.006                             |
| 26 | 0.000                         | 0.000                   | 0.000                         | 0.000                              | 0.000                             |
| 27 | 0.000                         | 0.000                   | 0.000                         | 0.000                              | 0.000                             |
| 28 | 0.000                         | 0.000                   | 0.000                         | 0.000                              | 0.000                             |
| 29 | 0.000                         | 0.481                   | 0.721                         | 2.548                              | 0.337                             |
| 30 | 0.000                         | 0.000                   | 0.000                         | 0.000                              | 0.005                             |
| 31 | 0.000                         | 0.000                   | 0.000                         | 0.000                              | 0.000                             |
| 32 | 0.000                         | 0.000                   | 0.000                         | 0.000                              | 0.004                             |
| 33 | 0.000                         | 0.000                   | 0.000                         | 0.000                              | 0.000                             |
| 34 | 0.000                         | 0.000                   | 0.000                         | 0.000                              | 0.060                             |
| 35 | 0.000                         | 0.000                   | 0.000                         | 0.000                              | 0.000                             |
| 36 | 0.000                         | 0.000                   | 0.000                         | 0.000                              | 0.005                             |
| 37 | 0.000                         | 0.000                   | 0.000                         | 0.000                              | 0.000                             |
| 38 | 0.000                         | 0.000                   | 0.000                         | 0.000                              | 0.000                             |
| 39 | 0.000                         | 0.000                   | 0.000                         | 0.000                              | 0.000                             |
| 40 | 0.000                         | 0.000                   | 0.005                         | 0.000                              | 0.000                             |
| 41 | 0.000                         | 0.000                   | 0.000                         | 0.000                              | 0.000                             |
| 42 | 0.004                         | 0.071                   | 0.052                         | 0.000                              | 0.037                             |
| 43 | 0.000                         | 0.007                   | 0.000                         | 0.000                              | 0.007                             |
| 44 | 0.000                         | 0.000                   | 0.000                         | 0.000                              | 0.000                             |
| 45 | 0.000                         | 0.000                   | 0.000                         | 0.000                              | 0.004                             |
| 46 | 0.000                         | 0.000                   | 0.000                         | 0.000                              | 0.000                             |
| 47 | 0.000                         | 0.000                   | 0.012                         | 0.000                              | 0.000                             |
| 48 | 0.000                         | 0.000                   | 0.000                         | 0.000                              | 0.000                             |
| 49 | 0.000                         | 0.006                   | 0.000                         | 0.000                              | 0.000                             |
| 50 | 0.000                         | 0.000                   | 0.000                         | 0.000                              | 0.000                             |
| 51 | 0.000                         | 0.000                   | 0.000                         | 0.000                              | 0.000                             |
| 52 | 0.000                         | 0.008                   | 0.004                         | 0.004                              | 0.004                             |
| 53 | NA                            | NA                      | NA                            | NA                                 | NA                                |
| 54 | NA                            | NA                      | NA                            | NA                                 | NA                                |
| 55 | NA                            | NA                      | NA                            | NA                                 | NA                                |
| 56 | NA                            | NA                      | NA                            | NA                                 | NA                                |
| 57 | NA                            | NA                      | NA                            | NA                                 | NA                                |
| 58 | NA                            | NA                      | NA                            | NA                                 | NA                                |
| 59 | NA                            | NA                      | NA                            | NA                                 | NA                                |
| 60 | NA                            | NA                      | NA                            | NA                                 | NA                                |
| 61 | NA                            | NA                      | NA                            | NA                                 | NA                                |
| 62 | NA                            | NA                      | NA                            | NA                                 | NA                                |
| 63 | NA                            | NA                      | NA                            | NA                                 | NA                                |
| 64 | NA                            | NA                      | NA                            | NA                                 | NA                                |
| 65 | NA                            | NA                      | NA                            | NA                                 | NA                                |

Table S1.

| ID | <i>Enterococcus faecalis</i> | <i>Atopobium rimae</i> | <i>Staphylococcus hominis</i> | <i>Raoultella planticola</i> | <i>Bifidobacterium bifidum</i> | <i>Veillonella atypica</i> |
|----|------------------------------|------------------------|-------------------------------|------------------------------|--------------------------------|----------------------------|
| 1  | 0.018                        | 0.000                  | 0.000                         | 0.000                        | 0.000                          | 0.000                      |
| 2  | 0.005                        | 0.000                  | 0.000                         | 0.005                        | 0.000                          | 0.000                      |
| 3  | 0.003                        | 0.003                  | 0.007                         | 0.007                        | 0.000                          | 0.003                      |
| 4  | 0.018                        | 0.000                  | 0.000                         | 0.018                        | 0.000                          | 0.000                      |
| 5  | 0.000                        | 1.251                  | 0.000                         | 0.000                        | 0.000                          | 0.000                      |
| 6  | 0.000                        | 0.000                  | 0.000                         | 0.000                        | 0.000                          | 0.145                      |
| 7  | 0.000                        | 0.000                  | 0.000                         | 0.000                        | 0.000                          | 0.000                      |
| 8  | 0.000                        | 0.000                  | 0.000                         | 0.000                        | 0.000                          | 0.000                      |
| 9  | 0.000                        | 0.000                  | 0.009                         | 0.000                        | 0.000                          | 0.000                      |
| 10 | 0.000                        | 0.000                  | 0.000                         | 0.000                        | 0.000                          | 0.000                      |
| 11 | 0.007                        | 0.000                  | 0.000                         | 0.000                        | 0.000                          | 0.000                      |
| 12 | 0.000                        | 0.000                  | 0.000                         | 0.000                        | 0.382                          | 0.000                      |
| 13 | 0.000                        | 0.000                  | 0.000                         | 0.042                        | 0.000                          | 0.000                      |
| 14 | 0.009                        | 0.000                  | 0.000                         | 0.000                        | 0.000                          | 0.000                      |
| 15 | 0.000                        | 0.000                  | 0.000                         | 0.009                        | 0.000                          | 0.000                      |
| 16 | 0.000                        | 0.000                  | 0.000                         | 0.010                        | 0.000                          | 0.000                      |
| 17 | 0.000                        | 0.000                  | 0.000                         | 0.007                        | 0.000                          | 0.007                      |
| 18 | 0.000                        | 0.000                  | 0.000                         | 0.000                        | 0.000                          | 0.000                      |
| 19 | 0.023                        | 0.000                  | 0.011                         | 0.000                        | 0.000                          | 0.000                      |
| 20 | 0.000                        | 0.000                  | 0.000                         | 0.037                        | 0.000                          | 0.000                      |
| 21 | 0.000                        | 0.000                  | 0.000                         | 0.000                        | 0.000                          | 0.000                      |
| 22 | 0.000                        | 0.000                  | 0.000                         | 0.000                        | 0.000                          | 0.000                      |
| 23 | 0.000                        | 0.000                  | 0.000                         | 0.000                        | 0.000                          | 0.000                      |
| 24 | 0.000                        | 0.000                  | 0.007                         | 0.000                        | 0.000                          | 0.000                      |
| 25 | 0.000                        | 0.000                  | 0.000                         | 0.000                        | 0.000                          | 0.000                      |
| 26 | 0.000                        | 0.000                  | 0.000                         | 0.000                        | 0.000                          | 0.000                      |
| 27 | 0.000                        | 0.000                  | 0.000                         | 0.011                        | 0.000                          | 0.000                      |
| 28 | 0.000                        | 0.000                  | 0.000                         | 0.000                        | 0.000                          | 0.000                      |
| 29 | 0.048                        | 0.000                  | 2.115                         | 0.433                        | 0.000                          | 0.000                      |
| 30 | 0.000                        | 0.000                  | 0.000                         | 0.000                        | 0.000                          | 0.000                      |
| 31 | 0.000                        | 0.000                  | 0.000                         | 0.000                        | 0.000                          | 0.000                      |
| 32 | 0.004                        | 0.004                  | 0.000                         | 0.000                        | 0.000                          | 0.000                      |
| 33 | 0.004                        | 0.000                  | 0.000                         | 0.004                        | 0.000                          | 0.000                      |
| 34 | 0.000                        | 0.000                  | 0.000                         | 0.000                        | 0.000                          | 0.000                      |
| 35 | 0.000                        | 0.000                  | 0.000                         | 0.000                        | 0.060                          | 0.000                      |
| 36 | 0.005                        | 0.000                  | 0.000                         | 0.005                        | 0.000                          | 0.000                      |
| 37 | 0.000                        | 0.024                  | 0.000                         | 0.000                        | 0.000                          | 0.073                      |
| 38 | 0.000                        | 0.000                  | 0.000                         | 0.000                        | 0.000                          | 0.000                      |
| 39 | 0.000                        | 0.000                  | 0.000                         | 0.000                        | 0.000                          | 0.000                      |
| 40 | 0.015                        | 0.000                  | 0.000                         | 0.000                        | 0.000                          | 0.000                      |
| 41 | 0.000                        | 0.000                  | 0.000                         | 0.000                        | 0.000                          | 0.000                      |
| 42 | 0.123                        | 0.004                  | 0.004                         | 0.000                        | 0.000                          | 0.011                      |
| 43 | 0.000                        | 0.000                  | 0.007                         | 0.007                        | 0.000                          | 0.007                      |
| 44 | 0.000                        | 0.000                  | 0.000                         | 0.000                        | 0.000                          | 0.000                      |
| 45 | 0.000                        | 0.000                  | 0.000                         | 0.026                        | 0.000                          | 0.000                      |
| 46 | 0.016                        | 0.000                  | 0.000                         | 0.000                        | 0.000                          | 0.000                      |
| 47 | 0.000                        | 0.000                  | 0.000                         | 0.000                        | 0.000                          | 0.000                      |
| 48 | 0.000                        | 0.000                  | 0.000                         | 0.000                        | 0.000                          | 0.000                      |
| 49 | 0.006                        | 0.000                  | 0.000                         | 0.006                        | 0.000                          | 0.006                      |
| 50 | 0.000                        | 0.000                  | 0.000                         | 0.000                        | 0.000                          | 0.000                      |
| 51 | 0.000                        | 0.000                  | 0.000                         | 0.000                        | 0.000                          | 0.000                      |
| 52 | 0.008                        | 0.000                  | 0.000                         | 0.004                        | 0.000                          | 0.000                      |
| 53 | NA                           | NA                     | NA                            | NA                           | NA                             | NA                         |
| 54 | NA                           | NA                     | NA                            | NA                           | NA                             | NA                         |
| 55 | NA                           | NA                     | NA                            | NA                           | NA                             | NA                         |
| 56 | NA                           | NA                     | NA                            | NA                           | NA                             | NA                         |
| 57 | NA                           | NA                     | NA                            | NA                           | NA                             | NA                         |
| 58 | NA                           | NA                     | NA                            | NA                           | NA                             | NA                         |
| 59 | NA                           | NA                     | NA                            | NA                           | NA                             | NA                         |
| 60 | NA                           | NA                     | NA                            | NA                           | NA                             | NA                         |
| 61 | NA                           | NA                     | NA                            | NA                           | NA                             | NA                         |
| 62 | NA                           | NA                     | NA                            | NA                           | NA                             | NA                         |
| 63 | NA                           | NA                     | NA                            | NA                           | NA                             | NA                         |
| 64 | NA                           | NA                     | NA                            | NA                           | NA                             | NA                         |
| 65 | NA                           | NA                     | NA                            | NA                           | NA                             | NA                         |



Table S1.

| ID | <i>Sutterella stercoricanis</i> | <i>Eubacterium eligens</i> | <i>Actinomyces meyeri</i> | <i>Porphyromonas bennonis</i> | <i>Eubacterium rectale</i> | <i>Streptococcus salivarius</i> |
|----|---------------------------------|----------------------------|---------------------------|-------------------------------|----------------------------|---------------------------------|
| 1  | 0.000                           | 0.000                      | 0.000                     | 0.000                         | 0.000                      | 0.000                           |
| 2  | 0.000                           | 0.000                      | 0.000                     | 0.000                         | 0.000                      | 0.000                           |
| 3  | 0.003                           | 0.055                      | 0.000                     | 0.000                         | 0.010                      | 0.003                           |
| 4  | 0.000                           | 0.000                      | 0.018                     | 0.000                         | 0.000                      | 0.109                           |
| 5  | 0.000                           | 0.000                      | 0.000                     | 0.000                         | 0.000                      | 0.000                           |
| 6  | 0.000                           | 0.000                      | 0.029                     | 0.153                         | 0.007                      | 0.000                           |
| 7  | 0.009                           | 0.000                      | 0.000                     | 0.000                         | 0.000                      | 0.000                           |
| 8  | 0.000                           | 0.000                      | 0.000                     | 0.000                         | 0.000                      | 0.000                           |
| 9  | 0.000                           | 0.000                      | 0.000                     | 0.000                         | 0.000                      | 0.000                           |
| 10 | 0.008                           | 0.000                      | 0.000                     | 0.000                         | 0.000                      | 0.000                           |
| 11 | 0.000                           | 0.000                      | 0.000                     | 0.000                         | 0.000                      | 0.000                           |
| 12 | 0.000                           | 0.000                      | 0.000                     | 0.000                         | 0.000                      | 0.000                           |
| 13 | 0.006                           | 0.000                      | 0.000                     | 0.000                         | 0.000                      | 0.000                           |
| 14 | 0.009                           | 0.000                      | 0.000                     | 0.000                         | 0.000                      | 0.000                           |
| 15 | 0.000                           | 0.000                      | 0.000                     | 0.000                         | 0.000                      | 0.000                           |
| 16 | 0.003                           | 0.037                      | 0.000                     | 0.000                         | 0.017                      | 0.013                           |
| 17 | 0.000                           | 0.007                      | 0.000                     | 0.000                         | 0.000                      | 0.000                           |
| 18 | 0.000                           | 0.000                      | 0.000                     | 0.000                         | 0.000                      | 0.000                           |
| 19 | 0.000                           | 0.000                      | 0.000                     | 0.000                         | 0.000                      | 0.057                           |
| 20 | 0.015                           | 0.000                      | 0.000                     | 0.000                         | 0.000                      | 0.000                           |
| 21 | 0.000                           | 0.000                      | 0.000                     | 0.000                         | 0.000                      | 0.000                           |
| 22 | 0.000                           | 0.000                      | 0.000                     | 0.000                         | 0.016                      | 0.000                           |
| 23 | 0.000                           | 0.000                      | 0.000                     | 0.000                         | 0.000                      | 0.000                           |
| 24 | 0.000                           | 0.000                      | 0.000                     | 0.000                         | 0.000                      | 0.000                           |
| 25 | 0.000                           | 0.006                      | 0.000                     | 0.000                         | 0.000                      | 0.000                           |
| 26 | 0.000                           | 0.000                      | 0.000                     | 0.000                         | 0.000                      | 0.000                           |
| 27 | 0.007                           | 0.000                      | 0.000                     | 0.000                         | 0.000                      | 0.000                           |
| 28 | 0.007                           | 0.000                      | 0.000                     | 0.000                         | 0.000                      | 0.000                           |
| 29 | 0.625                           | 0.000                      | 0.048                     | 0.000                         | 0.337                      | 0.385                           |
| 30 | 0.005                           | 0.000                      | 0.000                     | 0.000                         | 0.000                      | 0.000                           |
| 31 | 0.000                           | 0.004                      | 0.000                     | 0.000                         | 0.000                      | 0.000                           |
| 32 | 0.000                           | 0.000                      | 0.000                     | 0.000                         | 0.000                      | 0.000                           |
| 33 | 0.000                           | 0.000                      | 0.000                     | 0.000                         | 0.000                      | 0.000                           |
| 34 | 0.000                           | 0.000                      | 0.000                     | 0.000                         | 0.000                      | 0.000                           |
| 35 | 0.000                           | 0.000                      | 0.000                     | 0.000                         | 0.000                      | 0.000                           |
| 36 | 0.000                           | 0.000                      | 0.000                     | 0.000                         | 0.000                      | 0.000                           |
| 37 | 0.000                           | 0.000                      | 0.000                     | 0.000                         | 0.000                      | 0.000                           |
| 38 | 0.000                           | 0.000                      | 0.000                     | 0.000                         | 0.000                      | 0.000                           |
| 39 | 0.000                           | 0.000                      | 0.000                     | 0.000                         | 0.000                      | 0.000                           |
| 40 | 0.005                           | 0.000                      | 0.000                     | 0.000                         | 0.000                      | 0.000                           |
| 41 | 0.000                           | 0.000                      | 0.000                     | 0.000                         | 0.000                      | 0.000                           |
| 42 | 0.026                           | 0.019                      | 0.078                     | 0.015                         | 0.022                      | 0.000                           |
| 43 | 0.000                           | 0.000                      | 0.000                     | 0.000                         | 0.007                      | 0.000                           |
| 44 | 0.000                           | 0.000                      | 0.000                     | 0.000                         | 0.000                      | 0.000                           |
| 45 | 0.017                           | 0.000                      | 0.000                     | 0.000                         | 0.000                      | 0.000                           |
| 46 | 0.000                           | 0.000                      | 0.000                     | 0.000                         | 0.000                      | 0.000                           |
| 47 | 0.000                           | 0.000                      | 0.000                     | 0.000                         | 0.000                      | 0.000                           |
| 48 | 0.000                           | 0.000                      | 0.000                     | 0.000                         | 0.000                      | 0.000                           |
| 49 | 0.006                           | 0.000                      | 0.000                     | 0.000                         | 0.000                      | 0.000                           |
| 50 | 0.000                           | 0.000                      | 0.000                     | 0.000                         | 0.000                      | 0.000                           |
| 51 | 0.014                           | 0.000                      | 0.000                     | 0.000                         | 0.000                      | 0.000                           |
| 52 | 0.000                           | 0.015                      | 0.004                     | 0.004                         | 0.008                      | 0.004                           |
| 53 | NA                              | NA                         | NA                        | NA                            | NA                         | NA                              |
| 54 | NA                              | NA                         | NA                        | NA                            | NA                         | NA                              |
| 55 | NA                              | NA                         | NA                        | NA                            | NA                         | NA                              |
| 56 | NA                              | NA                         | NA                        | NA                            | NA                         | NA                              |
| 57 | NA                              | NA                         | NA                        | NA                            | NA                         | NA                              |
| 58 | NA                              | NA                         | NA                        | NA                            | NA                         | NA                              |
| 59 | NA                              | NA                         | NA                        | NA                            | NA                         | NA                              |
| 60 | NA                              | NA                         | NA                        | NA                            | NA                         | NA                              |
| 61 | NA                              | NA                         | NA                        | NA                            | NA                         | NA                              |
| 62 | NA                              | NA                         | NA                        | NA                            | NA                         | NA                              |
| 63 | NA                              | NA                         | NA                        | NA                            | NA                         | NA                              |
| 64 | NA                              | NA                         | NA                        | NA                            | NA                         | NA                              |
| 65 | NA                              | NA                         | NA                        | NA                            | NA                         | NA                              |

Table S1.

| ID | <i>Porphyromonas sp. type 1</i> | <i>Prevotella genogroup 6</i> | <i>Sutterella morbirenis</i> | <i>Lactobacillus mucosae</i> | <i>Lactobacillus rhamnosus</i> |
|----|---------------------------------|-------------------------------|------------------------------|------------------------------|--------------------------------|
| 1  | 0.000                           | 0.000                         | 0.000                        | 0.000                        | 0.000                          |
| 2  | 0.000                           | 0.000                         | 0.000                        | 0.000                        | 0.000                          |
| 3  | 0.000                           | 0.000                         | 0.003                        | 0.000                        | 0.000                          |
| 4  | 0.000                           | 0.000                         | 0.000                        | 0.000                        | 0.000                          |
| 5  | 0.000                           | 0.000                         | 0.000                        | 0.000                        | 0.000                          |
| 6  | 0.000                           | 0.000                         | 0.007                        | 0.000                        | 0.000                          |
| 7  | 0.000                           | 0.000                         | 0.000                        | 0.000                        | 0.000                          |
| 8  | 0.000                           | 0.006                         | 0.000                        | 0.000                        | 0.000                          |
| 9  | 0.000                           | 0.000                         | 0.000                        | 0.000                        | 0.000                          |
| 10 | 0.000                           | 0.000                         | 0.000                        | 0.000                        | 0.000                          |
| 11 | 0.007                           | 0.000                         | 0.000                        | 0.000                        | 0.000                          |
| 12 | 0.028                           | 0.000                         | 0.000                        | 0.000                        | 0.000                          |
| 13 | 0.010                           | 0.000                         | 0.003                        | 0.000                        | 0.000                          |
| 14 | 0.000                           | 0.000                         | 0.000                        | 0.000                        | 0.000                          |
| 15 | 0.000                           | 0.000                         | 0.000                        | 0.000                        | 0.000                          |
| 16 | 0.000                           | 0.000                         | 0.000                        | 0.000                        | 0.000                          |
| 17 | 0.000                           | 0.087                         | 0.000                        | 0.000                        | 0.000                          |
| 18 | 0.000                           | 0.000                         | 0.000                        | 0.000                        | 0.000                          |
| 19 | 0.000                           | 0.000                         | 0.000                        | 0.000                        | 0.011                          |
| 20 | 0.000                           | 0.000                         | 0.007                        | 0.000                        | 0.000                          |
| 21 | 0.000                           | 0.000                         | 0.000                        | 0.000                        | 0.000                          |
| 22 | 0.000                           | 0.000                         | 0.000                        | 0.000                        | 0.000                          |
| 23 | 0.000                           | 0.000                         | 0.000                        | 0.000                        | 0.000                          |
| 24 | 0.000                           | 0.000                         | 0.007                        | 0.000                        | 0.000                          |
| 25 | 0.000                           | 0.006                         | 0.000                        | 0.000                        | 0.000                          |
| 26 | 0.000                           | 0.000                         | 0.000                        | 0.000                        | 0.000                          |
| 27 | 0.000                           | 0.000                         | 0.000                        | 0.063                        | 0.000                          |
| 28 | 0.014                           | 0.000                         | 0.000                        | 0.000                        | 0.000                          |
| 29 | 0.048                           | 0.048                         | 0.288                        | 0.000                        | 0.000                          |
| 30 | 0.000                           | 0.000                         | 0.000                        | 0.000                        | 0.000                          |
| 31 | 0.000                           | 0.000                         | 0.000                        | 0.000                        | 0.000                          |
| 32 | 0.000                           | 0.000                         | 0.000                        | 0.000                        | 0.000                          |
| 33 | 0.000                           | 0.000                         | 0.004                        | 0.000                        | 0.000                          |
| 34 | 0.000                           | 0.000                         | 0.000                        | 0.000                        | 0.000                          |
| 35 | 0.060                           | 0.009                         | 0.000                        | 0.000                        | 0.000                          |
| 36 | 0.000                           | 0.000                         | 0.005                        | 0.000                        | 0.000                          |
| 37 | 0.000                           | 0.000                         | 0.000                        | 0.000                        | 0.000                          |
| 38 | 0.000                           | 0.000                         | 0.000                        | 0.000                        | 0.000                          |
| 39 | 0.000                           | 0.000                         | 0.000                        | 0.000                        | 0.000                          |
| 40 | 0.000                           | 0.000                         | 0.000                        | 0.000                        | 0.000                          |
| 41 | 0.000                           | 0.000                         | 0.000                        | 0.000                        | 0.000                          |
| 42 | 0.007                           | 0.007                         | 0.004                        | 0.000                        | 0.000                          |
| 43 | 0.000                           | 0.000                         | 0.000                        | 0.000                        | 0.000                          |
| 44 | 0.000                           | 0.000                         | 0.000                        | 0.000                        | 0.000                          |
| 45 | 0.000                           | 0.000                         | 0.009                        | 0.000                        | 0.069                          |
| 46 | 0.000                           | 0.000                         | 0.000                        | 0.000                        | 0.000                          |
| 47 | 0.000                           | 0.000                         | 0.000                        | 0.000                        | 0.000                          |
| 48 | 0.000                           | 0.000                         | 0.000                        | 0.000                        | 0.000                          |
| 49 | 0.000                           | 0.000                         | 0.006                        | 0.000                        | 0.000                          |
| 50 | 0.000                           | 0.000                         | 0.006                        | 0.000                        | 0.000                          |
| 51 | 0.000                           | 0.000                         | 0.000                        | 0.000                        | 0.000                          |
| 52 | 0.000                           | 0.000                         | 0.000                        | 0.000                        | 0.000                          |
| 53 | NA                              | NA                            | NA                           | NA                           | NA                             |
| 54 | NA                              | NA                            | NA                           | NA                           | NA                             |
| 55 | NA                              | NA                            | NA                           | NA                           | NA                             |
| 56 | NA                              | NA                            | NA                           | NA                           | NA                             |
| 57 | NA                              | NA                            | NA                           | NA                           | NA                             |
| 58 | NA                              | NA                            | NA                           | NA                           | NA                             |
| 59 | NA                              | NA                            | NA                           | NA                           | NA                             |
| 60 | NA                              | NA                            | NA                           | NA                           | NA                             |
| 61 | NA                              | NA                            | NA                           | NA                           | NA                             |
| 62 | NA                              | NA                            | NA                           | NA                           | NA                             |
| 63 | NA                              | NA                            | NA                           | NA                           | NA                             |
| 64 | NA                              | NA                            | NA                           | NA                           | NA                             |
| 65 | NA                              | NA                            | NA                           | NA                           | NA                             |

Table S1.

| ID | <i>Staphylococcus warneri</i> | <i>Staphylococcus lugdunensis</i> | <i>Sutterella wadsworthensis</i> | <i>Escherichia coli</i> | <i>Mycoplasma genitalium</i> |
|----|-------------------------------|-----------------------------------|----------------------------------|-------------------------|------------------------------|
| 1  | 0.000                         | 0.000                             | 0.000                            | 0.000                   | 0.000                        |
| 2  | 0.000                         | 0.000                             | 0.000                            | 0.000                   | 0.000                        |
| 3  | 0.000                         | 0.000                             | 0.000                            | 0.007                   | 0.000                        |
| 4  | 0.000                         | 0.036                             | 0.000                            | 0.000                   | 0.000                        |
| 5  | 0.000                         | 0.028                             | 0.000                            | 0.056                   | 0.000                        |
| 6  | 0.000                         | 0.000                             | 0.000                            | 0.000                   | 0.000                        |
| 7  | 0.000                         | 0.000                             | 0.000                            | 0.000                   | 0.000                        |
| 8  | 0.000                         | 0.000                             | 0.000                            | 0.000                   | 0.000                        |
| 9  | 0.000                         | 0.000                             | 0.000                            | 0.000                   | 0.000                        |
| 10 | 0.000                         | 0.000                             | 0.000                            | 0.000                   | 0.000                        |
| 11 | 0.000                         | 0.000                             | 0.000                            | 0.000                   | 0.000                        |
| 12 | 0.000                         | 0.000                             | 0.000                            | 0.000                   | 0.000                        |
| 13 | 0.000                         | 0.000                             | 0.010                            | 0.000                   | 0.000                        |
| 14 | 0.000                         | 0.000                             | 0.000                            | 0.000                   | 0.000                        |
| 15 | 0.000                         | 0.000                             | 0.000                            | 0.000                   | 0.000                        |
| 16 | 0.000                         | 0.000                             | 0.000                            | 0.000                   | 0.000                        |
| 17 | 0.000                         | 0.000                             | 0.000                            | 0.000                   | 0.000                        |
| 18 | 0.005                         | 0.000                             | 0.000                            | 0.000                   | 0.000                        |
| 19 | 0.000                         | 0.000                             | 0.000                            | 0.011                   | 0.000                        |
| 20 | 0.000                         | 0.007                             | 0.000                            | 0.000                   | 0.000                        |
| 21 | 0.000                         | 0.000                             | 0.000                            | 0.000                   | 0.000                        |
| 22 | 0.000                         | 0.000                             | 0.000                            | 0.000                   | 0.000                        |
| 23 | 0.000                         | 0.000                             | 0.000                            | 0.000                   | 0.000                        |
| 24 | 0.000                         | 0.000                             | 0.000                            | 0.000                   | 0.000                        |
| 25 | 0.000                         | 0.000                             | 0.000                            | 0.000                   | 0.000                        |
| 26 | 0.000                         | 0.000                             | 0.000                            | 0.000                   | 0.000                        |
| 27 | 0.000                         | 0.018                             | 0.000                            | 0.000                   | 0.000                        |
| 28 | 0.000                         | 0.000                             | 0.000                            | 0.000                   | 0.000                        |
| 29 | 0.625                         | 0.096                             | 0.000                            | 0.000                   | 0.000                        |
| 30 | 0.000                         | 0.010                             | 0.000                            | 0.000                   | 0.005                        |
| 31 | 0.000                         | 0.000                             | 0.000                            | 0.000                   | 0.000                        |
| 32 | 0.000                         | 0.000                             | 0.000                            | 0.000                   | 0.000                        |
| 33 | 0.000                         | 0.000                             | 0.000                            | 0.000                   | 0.000                        |
| 34 | 0.009                         | 0.000                             | 0.000                            | 0.000                   | 0.000                        |
| 35 | 0.000                         | 0.000                             | 0.043                            | 0.000                   | 0.000                        |
| 36 | 0.000                         | 0.000                             | 0.000                            | 0.000                   | 0.000                        |
| 37 | 0.000                         | 0.000                             | 0.000                            | 0.000                   | 0.000                        |
| 38 | 0.000                         | 0.000                             | 0.000                            | 0.000                   | 0.000                        |
| 39 | 0.000                         | 0.000                             | 0.000                            | 0.000                   | 0.000                        |
| 40 | 0.000                         | 0.000                             | 0.000                            | 0.000                   | 0.000                        |
| 41 | 0.000                         | 0.000                             | 0.000                            | 0.000                   | 0.000                        |
| 42 | 0.000                         | 0.000                             | 0.004                            | 0.000                   | 0.022                        |
| 43 | 0.000                         | 0.000                             | 0.000                            | 0.000                   | 0.007                        |
| 44 | 0.000                         | 0.000                             | 0.000                            | 0.000                   | 0.000                        |
| 45 | 0.000                         | 0.004                             | 0.000                            | 0.009                   | 0.000                        |
| 46 | 0.000                         | 0.000                             | 0.000                            | 0.000                   | 0.000                        |
| 47 | 0.000                         | 0.000                             | 0.000                            | 0.000                   | 0.000                        |
| 48 | 0.000                         | 0.000                             | 0.000                            | 0.000                   | 0.000                        |
| 49 | 0.000                         | 0.000                             | 0.000                            | 0.012                   | 0.000                        |
| 50 | 0.000                         | 0.000                             | 0.000                            | 0.000                   | 0.006                        |
| 51 | 0.000                         | 0.000                             | 0.000                            | 0.000                   | 0.000                        |
| 52 | 0.000                         | 0.004                             | 0.000                            | 0.000                   | 0.000                        |
| 53 | NA                            | NA                                | NA                               | NA                      | NA                           |
| 54 | NA                            | NA                                | NA                               | NA                      | NA                           |
| 55 | NA                            | NA                                | NA                               | NA                      | NA                           |
| 56 | NA                            | NA                                | NA                               | NA                      | NA                           |
| 57 | NA                            | NA                                | NA                               | NA                      | NA                           |
| 58 | NA                            | NA                                | NA                               | NA                      | NA                           |
| 59 | NA                            | NA                                | NA                               | NA                      | NA                           |
| 60 | NA                            | NA                                | NA                               | NA                      | NA                           |
| 61 | NA                            | NA                                | NA                               | NA                      | NA                           |
| 62 | NA                            | NA                                | NA                               | NA                      | NA                           |
| 63 | NA                            | NA                                | NA                               | NA                      | NA                           |
| 64 | NA                            | NA                                | NA                               | NA                      | NA                           |
| 65 | NA                            | NA                                | NA                               | NA                      | NA                           |

Table S1.

| ID | <i>Streptococcus sanguinis</i> | <i>Streptococcus intermedius</i> | <i>Pseudomonas aeruginosa</i> | <i>Staphylococcus aureus</i> | <i>Eubacterium sapenum</i> |
|----|--------------------------------|----------------------------------|-------------------------------|------------------------------|----------------------------|
| 1  | 0.000                          | 0.000                            | 0.000                         | 0.000                        | 0.000                      |
| 2  | 0.000                          | 0.000                            | 0.000                         | 0.000                        | 0.000                      |
| 3  | 0.000                          | 0.000                            | 0.000                         | 0.000                        | 0.000                      |
| 4  | 0.000                          | 0.018                            | 0.000                         | 0.000                        | 0.000                      |
| 5  | 0.000                          | 0.000                            | 0.000                         | 0.000                        | 0.000                      |
| 6  | 0.000                          | 0.015                            | 0.000                         | 0.000                        | 0.000                      |
| 7  | 0.000                          | 0.000                            | 0.000                         | 0.000                        | 0.000                      |
| 8  | 0.000                          | 0.000                            | 0.000                         | 0.000                        | 0.006                      |
| 9  | 0.000                          | 0.000                            | 0.000                         | 0.017                        | 0.000                      |
| 10 | 0.000                          | 0.000                            | 0.000                         | 0.000                        | 0.000                      |
| 11 | 0.000                          | 0.000                            | 0.000                         | 0.000                        | 0.000                      |
| 12 | 0.000                          | 0.000                            | 0.000                         | 0.000                        | 0.000                      |
| 13 | 0.000                          | 0.003                            | 0.000                         | 0.000                        | 0.000                      |
| 14 | 0.000                          | 0.000                            | 0.000                         | 0.000                        | 0.000                      |
| 15 | 0.000                          | 0.000                            | 0.000                         | 0.000                        | 0.000                      |
| 16 | 0.000                          | 0.000                            | 0.000                         | 0.000                        | 0.000                      |
| 17 | 0.000                          | 0.000                            | 0.000                         | 0.000                        | 0.000                      |
| 18 | 0.000                          | 0.000                            | 0.000                         | 0.000                        | 0.000                      |
| 19 | 0.000                          | 0.000                            | 0.000                         | 0.000                        | 0.000                      |
| 20 | 0.000                          | 0.000                            | 0.037                         | 0.000                        | 0.000                      |
| 21 | 0.000                          | 0.000                            | 0.000                         | 0.000                        | 0.000                      |
| 22 | 0.000                          | 0.000                            | 0.000                         | 0.000                        | 0.000                      |
| 23 | 0.000                          | 0.000                            | 0.000                         | 0.000                        | 0.000                      |
| 24 | 0.000                          | 0.000                            | 0.000                         | 0.000                        | 0.000                      |
| 25 | 0.000                          | 0.000                            | 0.000                         | 0.000                        | 0.000                      |
| 26 | 0.000                          | 0.000                            | 0.000                         | 0.000                        | 0.000                      |
| 27 | 0.000                          | 0.000                            | 0.000                         | 0.000                        | 0.000                      |
| 28 | 0.000                          | 0.000                            | 0.000                         | 0.000                        | 0.000                      |
| 29 | 0.000                          | 0.000                            | 0.000                         | 0.000                        | 0.000                      |
| 30 | 0.000                          | 0.000                            | 0.000                         | 0.005                        | 0.005                      |
| 31 | 0.000                          | 0.000                            | 0.000                         | 0.000                        | 0.000                      |
| 32 | 0.000                          | 0.000                            | 0.000                         | 0.000                        | 0.000                      |
| 33 | 0.000                          | 0.000                            | 0.000                         | 0.000                        | 0.000                      |
| 34 | 0.000                          | 0.000                            | 0.000                         | 0.000                        | 0.000                      |
| 35 | 0.000                          | 0.000                            | 0.000                         | 0.000                        | 0.000                      |
| 36 | 0.000                          | 0.000                            | 0.000                         | 0.000                        | 0.000                      |
| 37 | 0.000                          | 0.000                            | 0.000                         | 0.000                        | 0.000                      |
| 38 | 0.000                          | 0.000                            | 0.000                         | 0.000                        | 0.000                      |
| 39 | 0.000                          | 0.000                            | 0.000                         | 0.000                        | 0.000                      |
| 40 | 0.000                          | 0.000                            | 0.000                         | 0.005                        | 0.000                      |
| 41 | 0.000                          | 0.030                            | 0.000                         | 0.000                        | 0.000                      |
| 42 | 0.030                          | 0.000                            | 0.000                         | 0.000                        | 0.007                      |
| 43 | 0.000                          | 0.000                            | 0.000                         | 0.000                        | 0.000                      |
| 44 | 0.000                          | 0.000                            | 0.000                         | 0.000                        | 0.000                      |
| 45 | 0.000                          | 0.000                            | 0.000                         | 0.000                        | 0.000                      |
| 46 | 0.000                          | 0.000                            | 0.000                         | 0.000                        | 0.000                      |
| 47 | 0.000                          | 0.000                            | 0.000                         | 0.000                        | 0.000                      |
| 48 | 0.000                          | 0.000                            | 0.000                         | 0.000                        | 0.000                      |
| 49 | 0.000                          | 0.000                            | 0.000                         | 0.000                        | 0.000                      |
| 50 | 0.000                          | 0.000                            | 0.000                         | 0.000                        | 0.000                      |
| 51 | 0.000                          | 0.000                            | 0.000                         | 0.000                        | 0.000                      |
| 52 | 0.000                          | 0.000                            | 0.000                         | 0.004                        | 0.000                      |
| 53 | NA                             | NA                               | NA                            | NA                           | NA                         |
| 54 | NA                             | NA                               | NA                            | NA                           | NA                         |
| 55 | NA                             | NA                               | NA                            | NA                           | NA                         |
| 56 | NA                             | NA                               | NA                            | NA                           | NA                         |
| 57 | NA                             | NA                               | NA                            | NA                           | NA                         |
| 58 | NA                             | NA                               | NA                            | NA                           | NA                         |
| 59 | NA                             | NA                               | NA                            | NA                           | NA                         |
| 60 | NA                             | NA                               | NA                            | NA                           | NA                         |
| 61 | NA                             | NA                               | NA                            | NA                           | NA                         |
| 62 | NA                             | NA                               | NA                            | NA                           | NA                         |
| 63 | NA                             | NA                               | NA                            | NA                           | NA                         |
| 64 | NA                             | NA                               | NA                            | NA                           | NA                         |
| 65 | NA                             | NA                               | NA                            | NA                           | NA                         |

Table S1.

| ID | <i>Arcanobacterium haemolyticum</i> | <i>Weissella paramesenteroides</i> | <i>Pseudomonas fluorescens</i> | <i>Shuttleworthia satellites</i> | <i>Catonella morbi</i> |
|----|-------------------------------------|------------------------------------|--------------------------------|----------------------------------|------------------------|
| 1  | 0.000                               | 0.000                              | 0.000                          | 0.000                            | 0.000                  |
| 2  | 0.009                               | 0.000                              | 0.000                          | 0.000                            | 0.000                  |
| 3  | 0.000                               | 0.000                              | 0.000                          | 0.000                            | 0.000                  |
| 4  | 0.000                               | 0.000                              | 0.000                          | 0.000                            | 0.000                  |
| 5  | 0.000                               | 0.000                              | 0.000                          | 0.000                            | 0.000                  |
| 6  | 0.000                               | 0.000                              | 0.000                          | 0.000                            | 0.000                  |
| 7  | 0.000                               | 0.000                              | 0.000                          | 0.000                            | 0.000                  |
| 8  | 0.000                               | 0.000                              | 0.000                          | 0.000                            | 0.000                  |
| 9  | 0.000                               | 0.000                              | 0.000                          | 0.000                            | 0.000                  |
| 10 | 0.000                               | 0.000                              | 0.000                          | 0.000                            | 0.000                  |
| 11 | 0.000                               | 0.000                              | 0.000                          | 0.000                            | 0.000                  |
| 12 | 0.000                               | 0.000                              | 0.000                          | 0.000                            | 0.000                  |
| 13 | 0.000                               | 0.000                              | 0.000                          | 0.000                            | 0.000                  |
| 14 | 0.000                               | 0.000                              | 0.000                          | 0.000                            | 0.000                  |
| 15 | 0.000                               | 0.000                              | 0.000                          | 0.000                            | 0.000                  |
| 16 | 0.000                               | 0.000                              | 0.000                          | 0.000                            | 0.003                  |
| 17 | 0.000                               | 0.007                              | 0.000                          | 0.000                            | 0.000                  |
| 18 | 0.000                               | 0.000                              | 0.000                          | 0.000                            | 0.000                  |
| 19 | 0.000                               | 0.000                              | 0.000                          | 0.000                            | 0.000                  |
| 20 | 0.000                               | 0.000                              | 0.015                          | 0.000                            | 0.000                  |
| 21 | 0.000                               | 0.000                              | 0.000                          | 0.000                            | 0.000                  |
| 22 | 0.000                               | 0.000                              | 0.000                          | 0.000                            | 0.000                  |
| 23 | 0.000                               | 0.000                              | 0.000                          | 0.000                            | 0.000                  |
| 24 | 0.014                               | 0.000                              | 0.000                          | 0.000                            | 0.000                  |
| 25 | 0.000                               | 0.000                              | 0.000                          | 0.000                            | 0.000                  |
| 26 | 0.000                               | 0.000                              | 0.000                          | 0.000                            | 0.000                  |
| 27 | 0.000                               | 0.000                              | 0.000                          | 0.000                            | 0.000                  |
| 28 | 0.000                               | 0.000                              | 0.000                          | 0.007                            | 0.000                  |
| 29 | 0.000                               | 0.096                              | 0.048                          | 0.000                            | 0.000                  |
| 30 | 0.000                               | 0.000                              | 0.000                          | 0.000                            | 0.000                  |
| 31 | 0.000                               | 0.000                              | 0.000                          | 0.000                            | 0.000                  |
| 32 | 0.000                               | 0.000                              | 0.000                          | 0.004                            | 0.000                  |
| 33 | 0.000                               | 0.000                              | 0.000                          | 0.000                            | 0.000                  |
| 34 | 0.000                               | 0.000                              | 0.000                          | 0.000                            | 0.000                  |
| 35 | 0.000                               | 0.000                              | 0.000                          | 0.000                            | 0.000                  |
| 36 | 0.000                               | 0.000                              | 0.000                          | 0.000                            | 0.000                  |
| 37 | 0.000                               | 0.000                              | 0.000                          | 0.000                            | 0.000                  |
| 38 | 0.000                               | 0.000                              | 0.000                          | 0.000                            | 0.000                  |
| 39 | 0.000                               | 0.000                              | 0.000                          | 0.000                            | 0.000                  |
| 40 | 0.000                               | 0.000                              | 0.000                          | 0.000                            | 0.000                  |
| 41 | 0.000                               | 0.000                              | 0.000                          | 0.000                            | 0.000                  |
| 42 | 0.000                               | 0.000                              | 0.000                          | 0.004                            | 0.000                  |
| 43 | 0.000                               | 0.000                              | 0.000                          | 0.000                            | 0.000                  |
| 44 | 0.000                               | 0.000                              | 0.000                          | 0.000                            | 0.000                  |
| 45 | 0.000                               | 0.000                              | 0.000                          | 0.000                            | 0.000                  |
| 46 | 0.000                               | 0.000                              | 0.000                          | 0.000                            | 0.000                  |
| 47 | 0.000                               | 0.006                              | 0.000                          | 0.000                            | 0.000                  |
| 48 | 0.000                               | 0.000                              | 0.000                          | 0.000                            | 0.000                  |
| 49 | 0.000                               | 0.000                              | 0.000                          | 0.000                            | 0.000                  |
| 50 | 0.000                               | 0.000                              | 0.000                          | 0.000                            | 0.000                  |
| 51 | 0.000                               | 0.000                              | 0.000                          | 0.000                            | 0.000                  |
| 52 | 0.000                               | 0.000                              | 0.000                          | 0.000                            | 0.004                  |
| 53 | NA                                  | NA                                 | NA                             | NA                               | NA                     |
| 54 | NA                                  | NA                                 | NA                             | NA                               | NA                     |
| 55 | NA                                  | NA                                 | NA                             | NA                               | NA                     |
| 56 | NA                                  | NA                                 | NA                             | NA                               | NA                     |
| 57 | NA                                  | NA                                 | NA                             | NA                               | NA                     |
| 58 | NA                                  | NA                                 | NA                             | NA                               | NA                     |
| 59 | NA                                  | NA                                 | NA                             | NA                               | NA                     |
| 60 | NA                                  | NA                                 | NA                             | NA                               | NA                     |
| 61 | NA                                  | NA                                 | NA                             | NA                               | NA                     |
| 62 | NA                                  | NA                                 | NA                             | NA                               | NA                     |
| 63 | NA                                  | NA                                 | NA                             | NA                               | NA                     |
| 64 | NA                                  | NA                                 | NA                             | NA                               | NA                     |
| 65 | NA                                  | NA                                 | NA                             | NA                               | NA                     |

Table S1.

| ID | <i>Streptococcus equinus</i> | <i>Pseudomonas stutzeri</i> | <i>Acinetobacter baumannii</i> | <i>Eubacterium siraeum</i> | <i>Agrobacterium tumefaciens</i> |
|----|------------------------------|-----------------------------|--------------------------------|----------------------------|----------------------------------|
| 1  | 0.000                        | 0.000                       | 0.000                          | 0.000                      | 0.000                            |
| 2  | 0.000                        | 0.000                       | 0.000                          | 0.000                      | 0.000                            |
| 3  | 0.003                        | 0.000                       | 0.000                          | 0.000                      | 0.000                            |
| 4  | 0.000                        | 0.000                       | 0.000                          | 0.000                      | 0.000                            |
| 5  | 0.028                        | 0.000                       | 0.000                          | 0.000                      | 0.000                            |
| 6  | 0.000                        | 0.000                       | 0.000                          | 0.000                      | 0.000                            |
| 7  | 0.000                        | 0.000                       | 0.000                          | 0.000                      | 0.000                            |
| 8  | 0.000                        | 0.000                       | 0.000                          | 0.000                      | 0.000                            |
| 9  | 0.000                        | 0.000                       | 0.000                          | 0.000                      | 0.000                            |
| 10 | 0.000                        | 0.000                       | 0.000                          | 0.000                      | 0.000                            |
| 11 | 0.000                        | 0.000                       | 0.000                          | 0.000                      | 0.000                            |
| 12 | 0.000                        | 0.000                       | 0.000                          | 0.000                      | 0.000                            |
| 13 | 0.000                        | 0.000                       | 0.000                          | 0.000                      | 0.000                            |
| 14 | 0.000                        | 0.000                       | 0.000                          | 0.000                      | 0.000                            |
| 15 | 0.000                        | 0.000                       | 0.000                          | 0.000                      | 0.000                            |
| 16 | 0.000                        | 0.000                       | 0.000                          | 0.000                      | 0.000                            |
| 17 | 0.000                        | 0.000                       | 0.000                          | 0.007                      | 0.000                            |
| 18 | 0.000                        | 0.000                       | 0.000                          | 0.000                      | 0.000                            |
| 19 | 0.000                        | 0.000                       | 0.000                          | 0.000                      | 0.000                            |
| 20 | 0.000                        | 0.000                       | 0.000                          | 0.000                      | 0.000                            |
| 21 | 0.000                        | 0.000                       | 0.000                          | 0.000                      | 0.000                            |
| 22 | 0.000                        | 0.000                       | 0.000                          | 0.000                      | 0.000                            |
| 23 | 0.000                        | 0.000                       | 0.000                          | 0.000                      | 0.000                            |
| 24 | 0.000                        | 0.000                       | 0.000                          | 0.000                      | 0.000                            |
| 25 | 0.000                        | 0.000                       | 0.000                          | 0.000                      | 0.000                            |
| 26 | 0.000                        | 0.000                       | 0.000                          | 0.000                      | 0.000                            |
| 27 | 0.000                        | 0.000                       | 0.000                          | 0.000                      | 0.000                            |
| 28 | 0.000                        | 0.000                       | 0.000                          | 0.000                      | 0.000                            |
| 29 | 0.000                        | 0.000                       | 0.000                          | 0.000                      | 0.000                            |
| 30 | 0.000                        | 0.000                       | 0.000                          | 0.000                      | 0.000                            |
| 31 | 0.000                        | 0.000                       | 0.000                          | 0.000                      | 0.000                            |
| 32 | 0.000                        | 0.000                       | 0.000                          | 0.000                      | 0.000                            |
| 33 | 0.000                        | 0.000                       | 0.000                          | 0.000                      | 0.000                            |
| 34 | 0.000                        | 0.000                       | 0.000                          | 0.000                      | 0.000                            |
| 35 | 0.000                        | 0.000                       | 0.000                          | 0.000                      | 0.000                            |
| 36 | 0.000                        | 0.000                       | 0.000                          | 0.000                      | 0.000                            |
| 37 | 0.000                        | 0.000                       | 0.000                          | 0.000                      | 0.000                            |
| 38 | 0.000                        | 0.000                       | 0.000                          | 0.000                      | 0.000                            |
| 39 | 0.000                        | 0.000                       | 0.000                          | 0.000                      | 0.000                            |
| 40 | 0.000                        | 0.000                       | 0.000                          | 0.000                      | 0.000                            |
| 41 | 0.000                        | 0.000                       | 0.000                          | 0.000                      | 0.000                            |
| 42 | 0.000                        | 0.000                       | 0.000                          | 0.004                      | 0.000                            |
| 43 | 0.000                        | 0.000                       | 0.000                          | 0.000                      | 0.000                            |
| 44 | 0.000                        | 0.000                       | 0.005                          | 0.000                      | 0.000                            |
| 45 | 0.000                        | 0.009                       | 0.004                          | 0.000                      | 0.004                            |
| 46 | 0.000                        | 0.000                       | 0.000                          | 0.000                      | 0.000                            |
| 47 | 0.000                        | 0.000                       | 0.000                          | 0.000                      | 0.000                            |
| 48 | 0.000                        | 0.000                       | 0.000                          | 0.000                      | 0.000                            |
| 49 | 0.000                        | 0.000                       | 0.000                          | 0.000                      | 0.000                            |
| 50 | 0.000                        | 0.000                       | 0.000                          | 0.000                      | 0.000                            |
| 51 | 0.000                        | 0.000                       | 0.000                          | 0.000                      | 0.000                            |
| 52 | 0.000                        | 0.000                       | 0.000                          | 0.000                      | 0.000                            |
| 53 | NA                           | NA                          | NA                             | NA                         | NA                               |
| 54 | NA                           | NA                          | NA                             | NA                         | NA                               |
| 55 | NA                           | NA                          | NA                             | NA                         | NA                               |
| 56 | NA                           | NA                          | NA                             | NA                         | NA                               |
| 57 | NA                           | NA                          | NA                             | NA                         | NA                               |
| 58 | NA                           | NA                          | NA                             | NA                         | NA                               |
| 59 | NA                           | NA                          | NA                             | NA                         | NA                               |
| 60 | NA                           | NA                          | NA                             | NA                         | NA                               |
| 61 | NA                           | NA                          | NA                             | NA                         | NA                               |
| 62 | NA                           | NA                          | NA                             | NA                         | NA                               |
| 63 | NA                           | NA                          | NA                             | NA                         | NA                               |
| 64 | NA                           | NA                          | NA                             | NA                         | NA                               |
| 65 | NA                           | NA                          | NA                             | NA                         | NA                               |

Table S2. Metadata and immunological data

| ID | Clinical Characteristics |           |           |           |                     |            |     |        |           |             |
|----|--------------------------|-----------|-----------|-----------|---------------------|------------|-----|--------|-----------|-------------|
|    | HIV                      | Chlamydia | Gonorrhea | Nugent BV | Nugent Intermediate | Microbiota | HPV | HR-HPV | Clear HPV | Persist HPV |
| 1  | 0                        | 0         | 0         | 0         | 0                   | 0          | 0   | 0      | NA        | NA          |
| 2  | 0                        | 0         | 0         | 0         | 0                   | 1          | 1   | 1      | 0         | 1           |
| 3  | 0                        | 0         | 0         | 0         | 0                   | 0          | 0   | 0      | NA        | NA          |
| 4  | 0                        | 0         | 0         | 0         | 0                   | 0          | 1   | 1      | 1         | 0           |
| 5  | 0                        | 0         | 0         | 0         | 0                   | 1          | 0   | 0      | NA        | NA          |
| 6  | 0                        | 0         | 0         | 0         | 0                   | 0          | 0   | 0      | NA        | NA          |
| 7  | 0                        | 0         | 0         | 0         | 0                   | 1          | 1   | 1      | 1         | 0           |
| 8  | 0                        | 0         | 0         | 0         | 0                   | 1          | 1   | 0      | NA        | NA          |
| 9  | 0                        | 0         | 0         | 0         | 0                   | 0          | 0   | 0      | NA        | NA          |
| 10 | 0                        | 0         | 0         | 0         | 0                   | 0          | 0   | 0      | NA        | NA          |
| 11 | 0                        | 0         | 0         | 0         | 0                   | 1          | 0   | 0      | NA        | NA          |
| 12 | 0                        | 0         | 0         | 0         | 0                   | 1          | 1   | 0      | 0         | 1           |
| 13 | 0                        | 0         | 0         | 0         | 0                   | 0          | 0   | 0      | NA        | NA          |
| 14 | 0                        | 0         | 0         | 0         | 0                   | 0          | 0   | 0      | NA        | NA          |
| 15 | 0                        | 0         | 0         | 0         | 0                   | 0          | 0   | 0      | NA        | NA          |
| 16 | 0                        | 0         | 0         | 0         | 0                   | 0          | 0   | 0      | NA        | NA          |
| 17 | 0                        | 0         | 0         | 0         | 0                   | 0          | 0   | 0      | NA        | NA          |
| 18 | 0                        | 0         | 0         | 0         | 0                   | 1          | 1   | 1      | NA        | NA          |
| 19 | 0                        | 0         | 0         | 0         | 0                   | 0          | 1   | 1      | 1         | 0           |
| 20 | 0                        | 0         | 0         | 0         | 0                   | 0          | 0   | 0      | NA        | NA          |
| 21 | 0                        | 0         | 0         | 0         | 0                   | 0          | 0   | 0      | NA        | NA          |
| 22 | 0                        | 0         | 0         | 0         | 0                   | 0          | 1   | 1      | 0         | 1           |
| 23 | 0                        | 0         | 0         | 0         | 0                   | 0          | 0   | 0      | NA        | NA          |
| 24 | 0                        | 0         | 0         | 0         | 0                   | 0          | 0   | 0      | NA        | NA          |
| 25 | 0                        | 0         | 0         | 0         | 0                   | 0          | 0   | 0      | NA        | NA          |
| 26 | 0                        | 0         | 0         | 0         | 0                   | 1          | 1   | 0      | NA        | NA          |
| 27 | 0                        | 0         | 0         | 0         | 0                   | 0          | 0   | 0      | NA        | NA          |
| 28 | 0                        | 0         | 0         | 1         | 0                   | 0          | 0   | 0      | NA        | NA          |
| 29 | 0                        | 0         | 0         | 0         | 0                   | 1          | 0   | 0      | NA        | NA          |
| 30 | 0                        | 0         | 0         | 0         | 0                   | 1          | 0   | 0      | NA        | NA          |
| 31 | 0                        | 0         | 0         | 1         | 0                   | 0          | 1   | 1      | 1         | 0           |
| 32 | 0                        | 0         | 0         | 1         | 0                   | 0          | 1   | 1      | NA        | NA          |
| 33 | 0                        | 0         | 0         | 0         | 0                   | 1          | 0   | 0      | NA        | NA          |
| 34 | 0                        | 0         | 0         | 0         | 0                   | 0          | 0   | 0      | NA        | NA          |
| 35 | 0                        | 0         | 0         | 1         | 0                   | 0          | 1   | 0      | 1         | 0           |
| 36 | 0                        | 0         | 0         | 0         | 0                   | 0          | 1   | 0      | 1         | 0           |
| 37 | 0                        | 0         | 0         | 0         | 0                   | 1          | 0   | 0      | NA        | NA          |
| 38 | 0                        | 0         | 0         | 0         | 0                   | 0          | 0   | 0      | NA        | NA          |
| 39 | 0                        | 0         | 0         | 0         | 0                   | 0          | 0   | 0      | NA        | NA          |
| 40 | 0                        | 0         | 0         | 0         | 0                   | 1          | 0   | 0      | NA        | NA          |
| 41 | 0                        | 0         | 0         | 0         | 0                   | 0          | 1   | 0      | 1         | 0           |
| 42 | 0                        | 0         | 0         | 0         | 0                   | 1          | 0   | 0      | NA        | NA          |
| 43 | 0                        | 0         | 0         | 0         | 0                   | 0          | 0   | 0      | NA        | NA          |
| 44 | 0                        | 0         | 0         | 0         | 0                   | 0          | 0   | 0      | NA        | NA          |
| 45 | 0                        | 0         | 0         | 0         | 0                   | 0          | 0   | 0      | NA        | NA          |
| 46 | 0                        | 0         | 0         | 0         | 0                   | 0          | 0   | 0      | NA        | NA          |
| 47 | 0                        | 0         | 0         | 1         | 0                   | 0          | 0   | 0      | NA        | NA          |
| 48 | 0                        | 0         | 0         | 1         | 0                   | 0          | 1   | 0      | 0         | 1           |
| 49 | 0                        | 0         | 0         | 0         | 0                   | 0          | 0   | 0      | NA        | NA          |
| 50 | 0                        | 0         | 0         | 0         | 0                   | 0          | 1   | 0      | 0         | 1           |
| 51 | 0                        | 0         | 0         | 0         | 0                   | 1          | 0   | 0      | NA        | NA          |
| 52 | 0                        | 0         | 0         | 1         | 0                   | 0          | 1   | 0      | 0         | 1           |
| 53 | 0                        | 0         | 0         | 0         | 0                   | 1          | 0   | 0      | NA        | NA          |
| 54 | 0                        | 0         | 0         | 0         | 0                   | 0          | 1   | 1      | 1         | 0           |
| 55 | 0                        | 0         | 0         | 0         | 0                   | 0          | 1   | 0      | 0         | 0           |
| 56 | 0                        | 0         | 0         | 0         | 0                   | 0          | 0   | 0      | NA        | NA          |
| 57 | 0                        | 0         | 0         | 0         | 0                   | 1          | 1   | 1      | 0         | 1           |
| 58 | 0                        | 0         | 0         | 0         | 0                   | 0          | 1   | 0      | 0         | 1           |
| 59 | 0                        | 0         | 0         | 0         | 0                   | 1          | 1   | 0      | 0         | 1           |
| 60 | 0                        | 0         | 0         | 0         | 0                   | 1          | 1   | 1      | 1         | 0           |
| 61 | 0                        | 0         | 0         | 0         | 0                   | 1          | 1   | 1      | 0         | 1           |
| 62 | 0                        | 0         | 0         | 1         | 0                   | 0          | 1   | 1      | 1         | 0           |
| 63 | 0                        | 0         | 0         | 0         | 0                   | 1          | 0   | 0      | NA        | NA          |
| 64 | 0                        | 0         | 0         | 0         | 0                   | 1          | 0   | 0      | NA        | NA          |
| 65 | 0                        | 0         | 0         | 0         | 0                   | 1          | 1   | 0      | 1         | 0           |

Table S2.

| ID | Cervical T Cell Subsets |       |               |       |           |                |                |               |         |         |
|----|-------------------------|-------|---------------|-------|-----------|----------------|----------------|---------------|---------|---------|
|    | #CD4 T                  |       | %CCR5+        | #CD4+ | %CD69     | #CD4+          | %CD38+         | #CD4+         | %α4β7+  | #CD4+   |
|    | Cells                   | #CD4+ | CCR5+ of CD4+ | CD69+ | + of CD4+ | HLADR+ of CD4+ | HLADR+ of CD4+ | α4β7+ of CD4+ | of CD4+ | of CD4+ |
| 1  | 40                      |       | 21            | 52.5  | 19        | 47.5           | 6              | 15            | 1       | 2.5     |
| 2  | 146                     |       | 43            | 29.5  | 58        | 39.7           | 13             | 8.22          | 10      | 6.85    |
| 3  | 1369                    |       | 551           | 40.2  | 990       | 72.3           | 50             | 3.65          | 75      | 5.48    |
| 4  | 537                     |       | 228           | 42.5  | 297       | 55.3           | 14             | 2.23          | 67      | 12.5    |
| 5  | 123                     |       | 39            | 31.7  | 35        | 28.5           | 64             | 52            | 7       | 5.69    |
| 6  | 253                     |       | 48            | 19    | 81        | 32             | 5              | 1.98          | 15      | 5.93    |
| 7  | 353                     |       | 50            | 14.2  | 47        | 13.3           | 8              | 2.27          | 75      | 21.2    |
| 8  | 912                     |       | 318           | 34.9  | 712       | 78.1           | 117            | 12.8          | 265     | 29.1    |
| 9  | 2285                    |       | 1381          | 60.4  | 1429      | 62.5           | 111            | 4.86          | 265     | 11.6    |
| 10 | 641                     |       | 148           | 23.1  | 187       | 29.2           | 28             | 4.37          | 55      | 8.58    |
| 11 | 1749                    |       | 616           | 35.2  | 684       | 39.1           | 50             | 2.86          | 154     | 8.81    |
| 12 | 3016                    |       | 992           | 32.9  | 942       | 31.2           | 202            | 6.7           | 308     | 10.2    |
| 13 | 1672                    |       | 312           | 18.7  | 465       | 27.8           | 5              | 0.299         | 139     | 8.31    |
| 14 | 2100                    |       | 196           | 9.33  | 464       | 22.1           | 53             | 2.52          | 54      | 2.57    |
| 15 | 392                     |       | 105           | 26.8  | 136       | 34.7           | 4              | 1.02          | 43      | 11      |
| 16 | 2052                    |       | 1254          | 61.1  | 1339      | 65.3           | 212            | 10.3          | 241     | 11.7    |
| 17 | 857                     |       | 347           | 40.5  | 501       | 58.5           | 45             | 5.25          | 132     | 15.4    |
| 18 | 375                     |       | 258           | 68.8  | 218       | 58.1           | 47             | 12.5          | 49      | 13.1    |
| 19 | 1347                    |       | 978           | 72.6  | 674       | 50             | 179            | 13.3          | 88      | 6.53    |
| 20 | 227                     |       | 135           | 59.5  | 5         | 2.2            | 93             | 41            | 40      | 17.6    |
| 21 | 10475                   |       | 5034          | 48.1  | 8370      | 79.9           | 473            | 4.52          | 637     | 6.08    |
| 22 | 3842                    |       | 1282          | 33.4  | 1715      | 44.6           | 344            | 8.95          | 319     | 8.3     |
| 23 | 1458                    |       | 730           | 50.1  | 647       | 44.4           | 277            | 19            | 160     | 11      |
| 24 | 1063                    |       | 541           | 50.9  | 796       | 74.9           | 106            | 9.97          | 105     | 9.88    |
| 25 | 3566                    |       | 2059          | 57.7  | 2708      | 75.9           | 124            | 3.48          | 275     | 7.71    |
| 26 | 196                     |       | 80            | 40.8  | 113       | 57.7           | 10             | 5.1           | 19      | 9.69    |
| 27 | 215                     |       | 127           | 59.1  | 106       | 49.3           | 26             | 12.1          | 22      | 10.2    |
| 28 | 1371                    |       | 611           | 44.6  | 418       | 30.5           | 189            | 13.8          | 195     | 14.2    |
| 29 | 504                     |       | 325           | 64.5  | 351       | 69.6           | 79             | 15.7          | 119     | 23.6    |
| 30 | 143                     |       | 107           | 74.8  | 85        | 59.4           | 19             | 13.3          | 33      | 23.1    |
| 31 | 564                     |       | 243           | 43.1  | 197       | 34.9           | 100            | 17.7          | 80      | 14.2    |
| 32 | 374                     |       | 261           | 69.8  | 127       | 34             | 62             | 16.6          | 62      | 16.6    |
| 33 | NA                      | NA    | NA            | NA    | NA        | NA             | NA             | NA            | NA      | NA      |
| 34 | NA                      | NA    | NA            | NA    | NA        | NA             | NA             | NA            | NA      | NA      |
| 35 | NA                      | NA    | NA            | NA    | NA        | NA             | NA             | NA            | NA      | NA      |
| 36 | 2216                    |       | 859           | 38.8  | 682       | 30.8           | 186            | 8.39          | 117     | 5.28    |
| 37 | 3608                    |       | 2230          | 61.8  | 2930      | 81.2           | 269            | 7.46          | 650     | 18      |
| 38 | 223                     |       | 117           | 52.5  | 9         | 4.04           | 9              | 4.04          | 13      | 5.83    |
| 39 | 470                     |       | 159           | 33.8  | 228       | 48.5           | 39             | 8.3           | 94      | 20      |
| 40 | 852                     |       | 712           | 83.6  | 660       | 77.5           | 241            | 28.3          | 234     | 27.5    |
| 41 | NA                      | NA    | NA            | NA    | NA        | NA             | NA             | NA            | NA      | NA      |
| 42 | 371                     |       | 70            | 18.9  | 42        | 11.3           | 37             | 9.97          | 48      | 12.9    |
| 43 | 308                     |       | 105           | 34.1  | 105       | 34.1           | 2              | 0.649         | 66      | 21.4    |
| 44 | 391                     |       | 277           | 70.8  | 280       | 71.6           | 78             | 19.9          | 42      | 10.7    |
| 45 | 139                     |       | 47            | 33.8  | 46        | 33.1           | 11             | 8.63          | 53      | 38.1    |
| 46 | 1243                    |       | 347           | 27.9  | 698       | 56.2           | 65             | 5.23          | 193     | 15.5    |
| 47 | 222                     |       | 79            | 35.6  | 84        | 37.8           | 11             | 5.41          | 54      | 24.3    |
| 48 | 39                      |       | 22            | 56.4  | 14        | 35.9           | 1              | 2.56          | 1       | 2.56    |
| 49 | 176                     |       | 85            | 48.3  | 66        | 37.5           | 12             | 6.82          | 21      | 11.9    |
| 50 | NA                      | NA    | NA            | NA    | NA        | NA             | NA             | NA            | NA      | NA      |
| 51 | 229                     |       | 135           | 59    | 128       | 55.9           | 26             | 11.4          | 52      | 22.7    |
| 52 | 55                      |       | 9             | 16.4  | 6         | 10.9           | 2              | 3.64          | 22      | 40      |
| 53 | 115                     |       | 12            | 10    | 30        | 26.0           | 1              | 1             | 11      | 10      |
| 54 | 303                     |       | 24            | 8     | 8         | 3.0            | 4              | 1             | 57      | 19      |
| 55 | 262                     |       | 131           | 50    | 120       | 46.0           | 6              | 2             | 33      | 13      |
| 56 | NA                      | NA    | NA            | NA    | NA        | NA             | NA             | NA            | NA      | NA      |
| 57 | 149                     |       | 136           | 91    | 114       | 76.0           | 42             | 28            | 63      | 42      |
| 58 | 2284                    |       | 1171          | 51    | 1036      | 45.0           | 466            | 20            | 372     | 16      |
| 59 | 83                      |       | 34            | 41    | 20        | 24.0           | 34             | 41            | 8       | 10      |
| 60 | 2204                    |       | 1125          | 51    | 172       | 8.0            | 494            | 22            | 172     | 8       |
| 61 | 577                     |       | 423           | 73    | 411       | 71.0           | 56             | 10            | 51      | 9       |
| 62 | 454                     |       | 125           | 28    | 30        | 7.0            | 17             | 4             | 116     | 26      |
| 63 | 341                     |       | 199           | 58    | 52        | 15.0           | 136            | 40            | 23      | 7       |
| 64 | 247                     |       | 157           | 64    | 45        | 18.0           | 99             | 40            | 33      | 13      |
| 65 | 149                     |       | 38            | 26    | 29        | 19.5           | 0              | 0             | 14      | 9       |



Table S2.

| ID | Cervical Dendritic Cell Subsets |        |        |       |       |          |            |        |            |          |            |        | CD4+ T cell Subsets in Blood<br>(Proportion exp by CD4+ T cells) |         |       |  |
|----|---------------------------------|--------|--------|-------|-------|----------|------------|--------|------------|----------|------------|--------|------------------------------------------------------------------|---------|-------|--|
|    | #Langerhans                     | #mDC   | #mDC   | %MR+  | #mDC  | %DCSIGN+ | #Monocytes | %MR+   | #Monocytes | %DCSIGN+ | #Monocytes | %CCR5+ | %CD69+                                                           | HLADR+  | %α4β7 |  |
|    |                                 |        | exp.   | of    | exp.  | of mDC   |            | of     | of         | of       |            |        |                                                                  |         |       |  |
| 1  | 791                             | 266000 | 1786   | 0.671 | 16150 | 6.07     | 26654      | 219    | 0.822      | 11790    | 44.2       | 0.509  | 0.45                                                             | 0.126   | 4.82  |  |
| 2  | 207                             | 3645   | 41     | 1.12  | 1900  | 52.1     | 3086       | 35     | 1.13       | 2438     | 79         | 2.54   | 0.345                                                            | 0.201   | 8.76  |  |
| 3  | 125                             | 10349  | 4820   | 46.6  | 2273  | 22       | 3666       | 3213   | 87.6       | 633      | 17.3       | 0.935  | 0.103                                                            | 0.246   | 3.8   |  |
| 4  | 322                             | 5333   | 562    | 10.5  | 2197  | 41.2     | 2241       | 408    | 18.2       | 1218     | 54.4       | 2.52   | 0.249                                                            | 0.391   | 5.76  |  |
| 5  | 818                             | 3281   | 24     | 0.731 | 1335  | 40.7     | 4760       | 70     | 1.47       | 1681     | 35.3       | 0.405  | 0.22                                                             | 0.21    | 3.34  |  |
| 6  | 859                             | 700    | 36     | 5.14  | 287   | 41       | 1041       | 98     | 9.41       | 597      | 57.3       | 1.11   | 0.109                                                            | 0.161   | 9.14  |  |
| 7  | 193                             | 11374  | 7619   | 67    | 9478  | 83.3     | 12375      | 9119   | 73.7       | 11069    | 89.4       | 2.53   | 1.2                                                              | 0.399   | 15.5  |  |
| 8  | 19                              | 2656   | 43     | 1.62  | 127   | 4.78     | 15328      | 3812   | 24.9       | 231      | 1.51       | 1      | 1.76                                                             | 0.248   | 20.1  |  |
| 9  | 389                             | 1923   | 701    | 36.5  | 482   | 25.1     | 5807       | 1097   | 18.9       | 4579     | 78.9       | 2.34   | 1.14                                                             | 0.0939  | 4.92  |  |
| 10 | 369                             | 22344  | 680    | 3.04  | 13516 | 60.5     | 24426      | 428    | 1.75       | 20670    | 84.6       | 1.56   | 0.31                                                             | 0.497   | 2.27  |  |
| 11 | 146                             | 17396  | 1969   | 11.3  | 8784  | 50.5     | 15774      | 1824   | 11.6       | 12268    | 77.8       | 4.8    | 0.262                                                            | 0.516   | 16.8  |  |
| 12 | 361                             | 8138   | 262    | 3.22  | 207   | 2.54     | 14935      | 5740   | 38.4       | 1522     | 10.2       | 5.73   | 1.36                                                             | 0.136   | 8.27  |  |
| 13 | 765                             | 4506   | 1465   | 32.5  | 390   | 8.66     | 14979      | 3233   | 21.6       | 551      | 3.68       | 0.926  | 0.413                                                            | 0.00454 | 9.36  |  |
| 14 | 68                              | 11940  | 706    | 5.91  | 6649  | 55.7     | 27110      | 2431   | 8.97       | 12585    | 46.4       | 0.242  | 0.14                                                             | 0.397   | 3.01  |  |
| 15 | 48                              | 4778   | 1176   | 24.6  | 416   | 8.71     | 2705       | 2032   | 75.1       | 449      | 16.6       | 0.862  | 0.173                                                            | 0.2     | 10.4  |  |
| 16 | 717                             | 33632  | 2394   | 7.12  | 837   | 2.49     | 36477      | 3053   | 8.37       | 854      | 2.34       | 6.65   | 0.595                                                            | 1.29    | 5.22  |  |
| 17 | 98                              | 5810   | 299    | 5.15  | 847   | 14.6     | 4444       | 263    | 5.92       | 747      | 16.8       | 5.14   | 0.191                                                            | 1.04    | 9.73  |  |
| 18 | 84                              | 1608   | 444    | 27.6  | 154   | 9.58     | 1766       | 299    | 16.9       | 248      | 14         | 10.5   | 0.687                                                            | 1.26    | 19    |  |
| 19 | 2778                            | 56032  | 2423   | 4.32  | 7234  | 12.9     | 87905      | 4229   | 4.81       | 8963     | 10.2       | 10.8   | 1.27                                                             | 2.51    | 27.8  |  |
| 20 | 73                              | 25484  | 575    | 2.26  | 729   | 2.86     | 24799      | 238    | 0.96       | 347      | 1.4        | 26.9   | 1.79                                                             | 1.45    | 16.8  |  |
| 21 | 25                              | 1293   | 222    | 17.2  | 459   | 35.5     | 1150       | 77     | 6.7        | 438      | 38.1       | 22     | 0.251                                                            | 1.02    | 21.8  |  |
| 22 | 140                             | 108000 | 92807  | 85.9  | 9816  | 9.12     | 105000     | 91708  | 87.3       | 9464     | 9.01       | 5.26   | 0.206                                                            | 1.07    | 26.5  |  |
| 23 | 42                              | 8416   | 1344   | 16    | 1612  | 19.2     | 16707      | 729    | 4.36       | 4170     | 25         | 4.71   | 0.0654                                                           | 0.22    | 26.3  |  |
| 24 | 481                             | 137000 | 126000 | 92    | 12232 | 8.95     | 128000     | 121000 | 94.5       | 11861    | 9.3        | 7.67   | 10.4                                                             | 0.39    | 16.3  |  |
| 25 | 4836                            | 66821  | 23835  | 35.7  | 9945  | 14.9     | 43950      | 21304  | 48.5       | 9105     | 20.7       | 3.12   | 3.12                                                             | 0.711   | 23    |  |
| 26 | 133                             | 3060   | 112    | 3.66  | 1803  | 58.9     | 3382       | 36     | 1.06       | 2410     | 71.3       | 2.95   | 2.38                                                             | 0.634   | 16.5  |  |
| 27 | 24                              | 5896   | 1029   | 17.5  | 936   | 15.9     | 4107       | 879    | 21.4       | 878      | 21.4       | 1.8    | 0.504                                                            | 0.32    | 9.62  |  |
| 28 | 867                             | 7341   | 619    | 8.43  | 1118  | 15.2     | 7618       | 840    | 11         | 1728     | 22.7       | 2.37   | 0.192                                                            | 0.372   | 30.1  |  |
| 29 | 192                             | 2386   | 340    | 14.2  | 428   | 17.9     | 1302       | 202    | 15.5       | 434      | 33.3       | 0.453  | 0.191                                                            | 0.175   | 5.57  |  |
| 30 | 109                             | 439    | 53     | 12.1  | 59    | 13.4     | 259        | 31     | 12         | 51       | 19.7       | 0      | 0                                                                | 0       | 100   |  |
| 31 | 15818                           | 66747  | 22953  | 34.4  | 18334 | 27.5     | 41918      | 19919  | 47.5       | 16408    | 39.1       | 2.01   | 0.0806                                                           | 0.661   | 37    |  |
| 32 | 357                             | 2896   | 1295   | 44.7  | 875   | 30.2     | 1291       | 810    | 62.7       | 658      | 51         | 3.18   | 0.32                                                             | 0.168   | 21.2  |  |
| 33 | NA                              | NA     | NA     | NA    | NA    | NA       | NA         | NA     | NA         | NA       | NA         | NA     | NA                                                               | NA      | NA    |  |
| 34 | NA                              | NA     | NA     | NA    | NA    | NA       | NA         | NA     | NA         | NA       | NA         | NA     | NA                                                               | NA      | NA    |  |
| 35 | NA                              | NA     | NA     | NA    | NA    | NA       | NA         | NA     | NA         | NA       | NA         | NA     | NA                                                               | NA      | NA    |  |
| 36 | 6551                            | 73797  | 55663  | 75.4  | 4119  | 5.58     | 11571      | 10667  | 92.2       | 2394     | 20.7       | 2.09   | 2.85                                                             | 0.245   | 13.8  |  |
| 37 | 1504                            | 55685  | 23536  | 42.3  | 9929  | 17.8     | 30575      | 17367  | 56.8       | 11056    | 36.2       | 1.17   | 7.57                                                             | 0.146   | 7.48  |  |
| 38 | 403                             | 584    | 4      | 0.685 | 460   | 78.8     | 7989       | 91     | 1.14       | 1849     | 23.1       | 5.98   | 1.09                                                             | 0.533   | 13    |  |
| 39 | 1329                            | 2284   | 215    | 9.41  | 1720  | 75.3     | 6107       | 2019   | 33.1       | 4451     | 72.9       | 0.306  | 1.25                                                             | 0.981   | 6.01  |  |
| 40 | 155                             | 10886  | 1460   | 13.4  | 4845  | 44.5     | 8111       | 1251   | 15.4       | 4201     | 51.8       | 4.67   | 0.823                                                            | 3.77    | 19.7  |  |
| 41 | NA                              | NA     | NA     | NA    | NA    | NA       | NA         | NA     | NA         | NA       | NA         | 16.5   | 18.3                                                             | 36.7    | 4.59  |  |
| 42 | 4936                            | 2323   | 1409   | 60.7  | 148   | 6.37     | 2249       | 2018   | 89.7       | 208      | 9.25       | 8.65   | 1.22                                                             | 2.13    | 23.5  |  |
| 43 | 78                              | 15274  | 202    | 1.32  | 309   | 2.02     | 18483      | 131    | 0.709      | 157      | 0.849      | 3.9    | 0.766                                                            | 0.0734  | 6.22  |  |
| 44 | 99                              | 2801   | 1275   | 45.5  | 353   | 12.6     | 5198       | 1731   | 33.3       | 880      | 16.9       | 16.7   | 0.571                                                            | 1.2     | 10.1  |  |
| 45 | 302                             | 590    | 229    | 38.8  | 183   | 31       | 540        | 124    | 23         | 164      | 30.4       | 4.8    | 0.252                                                            | 0.14    | 4.99  |  |
| 46 | 141                             | 29664  | 9693   | 32.7  | 13220 | 44.6     | 26167      | 10641  | 40.7       | 13745    | 52.5       | 0.612  | 0.394                                                            | 0.432   | 8.86  |  |
| 47 | 146                             | 2347   | 89     | 3.79  | 1530  | 65.2     | 10347      | 99     | 0.957      | 6050     | 58.5       | 2.94   | 0.271                                                            | 0.0881  | 10.9  |  |
| 48 | 73                              | 214    | 17     | 7.94  | 90    | 42.1     | 393        | 19     | 4.83       | 183      | 46.6       | 0.18   | 0.126                                                            | 0.162   | 10.9  |  |
| 49 | 68                              | 1943   | 130    | 6.69  | 1085  | 55.8     | 15539      | 242    | 1.56       | 8760     | 56.4       | 6.32   | 0.204                                                            | 0.269   | 9.34  |  |
| 50 | NA                              | NA     | NA     | NA    | NA    | NA       | NA         | NA     | NA         | NA       | NA         | 9.33   | 0.19                                                             | 1.52    | 18.7  |  |
| 51 | 196                             | 2214   | 299    | 13.5  | 326   | 14.7     | 813        | 272    | 33.5       | 226      | 27.8       | 2.2    | 2.18                                                             | 0.277   | 35.2  |  |
| 52 | 81                              | 1446   | 8      | 0.553 | 1400  | 96.8     | 1591       | 20     | 1.26       | 660      | 41.5       | 6.26   | 0.148                                                            | 0.167   | 7.97  |  |
| 53 | 40                              | 1155   | 47     | 4     | 264   | 23       | 2111       | 56     | 3          | 960      | 46         | 1      | 1                                                                | 0       | 16    |  |
| 54 | 172                             | 275    | 10     | 4     | 73    | 26       | 395        | 17     | 4          | 203      | 51         | 0      | 0                                                                | 0       | 8     |  |
| 55 | 567                             | 1346   | 241    | 18    | 304   | 23       | 2178       | 755    | 35         | 1115     | 51         | 4      | 0                                                                | 1       | 6     |  |
| 56 | NA                              | NA     | NA     | NA    | NA    | NA       | NA         | NA     | NA         | NA       | NA         | NA     | NA                                                               | NA      | NA    |  |
| 57 | 458                             | 519    | 28     | 5     | 139   | 27       | 1152       | 21     | 2          | 267      | 23         | 6      | 0                                                                | 2       | 30    |  |
| 58 | 27270                           | 62411  | 32986  | 53    | 1870  | 3        | 15780      | 13200  | 84         | 1250     | 8          | 2      | 0                                                                | 0       | 35    |  |
| 59 | 102                             | 723    | 369    | 51    | 3     | 0        | 4541       | 973    | 21         | 18       | 0          | 5      | 0                                                                | 2       | 4     |  |
| 60 | 1401                            | 11831  | 464    | 4     | 1251  | 11       | 5863       | 1820   | 31         | 4119     | 70         | 1      | 0                                                                | 0       | 2     |  |
| 61 | 17                              | 1442   | 537    | 37    | 382   | 26       | 647        | 399    | 62         | 422      | 65         | 7      | 0                                                                | 0       | 10    |  |
| 62 | 18                              | 260    | 242    | 93    | 222   | 85       | 611        | 309    | 51         | 340      | 56         | 6      | 3                                                                | 0       | 20    |  |
| 63 | 1465                            | 153    | 124    | 81    | 39    | 26       | 559        | 431    | 77         | 246      | 44         | 5      | 4                                                                | 10      | 28    |  |
| 64 | 169                             | 821    | 614    | 75    | 202   | 25       | 1448       | 1084   | 75         | 271      | 19         | 15     | 1                                                                | 2       | 11    |  |
| 65 | 104                             | 1453   | 326    | 22    | 100   | 7        | 4922       | 1119   | 23         | 1887     | 38         | 7      | 0                                                                | 0       | 11    |  |

Table S2.

| ID | Cervico-vaginal Cytokines (pg/mL) |               |            |         |           |                |         |         |          |              |          |          |               |               |
|----|-----------------------------------|---------------|------------|---------|-----------|----------------|---------|---------|----------|--------------|----------|----------|---------------|---------------|
|    | GM-CSF                            | IL-1 $\alpha$ | IL-8       | MCP-1   | MIG       | MIP-3 $\alpha$ | RANTES  | IL-10   | IL-17    | IL-1 $\beta$ | IL-6     | IP-10    | MIP-1 $\beta$ | TNF- $\alpha$ |
| 1  | 5.7                               | 239.86        | 301.84     | 176.95  | 1952.04   | 5.84           | 3.2     | 3.4     | 3.7      | 7.4          | 6.4      | 314.131  | 18.2          | 3.4           |
| 2  | 5.7                               | 579.17        | 7932.2     | 266.55  | 2347.4    | 376.94         | 13.06   | 3.4     | 11.903   | 217.528      | 127.99   | 309.631  | 18.2          | 3.4           |
| 3  | 5.7                               | 2328.66       | 34182.04   | 476.59  | 3943.62   | 15.86          | 12.78   | 3.4     | 10.689   | 557.352      | 187.746  | 902.156  | 119.894       | 3.4           |
| 4  | 6.29                              | 6404.48       | 102978.36  | 71.81   | 8617.27   | 34.04          | 11.86   | 4.512   | 25.526   | 1633.048     | 35.005   | 1173.591 | 23.525        | 3.4           |
| 5  | 51.41                             | 35650.95      | 810625.97  | 941.17  | 10995.31  | 15.94          | 87.11   | 43.438  | 168.679  | 34970.643    | 89.832   | 347.224  | 181.25        | 16.071        |
| 6  | 5.7                               | 1286.87       | 9230.48    | 29.85   | 424.25    | 8.95           | 7.38    | 3.4     | 4.081    | 542.142      | 19.079   | 42       | 18.2          | 3.4           |
| 7  | 5.7                               | 606.28        | 2452       | 521.37  | 4284.13   | 4.17           | 7.8     | 3.4     | 3.7      | 19.477       | 9.074    | 973.863  | 18.2          | 3.4           |
| 8  | 54.27                             | 12434.18      | 763303.41  | 828.8   | 112551.8  | 35.32          | 743.71  | 41.993  | 321.874  | 30941.668    | 254.863  | 6719.587 | 1330.603      | 82.848        |
| 9  | 5.7                               | 1724.74       | 94650.71   | 187.99  | 5426.73   | 257.81         | 23.57   | 3.4     | 19.579   | 1193.69      | 465.002  | 660.739  | 40.24         | 3.4           |
| 10 | 5.7                               | 1191.03       | 11041.18   | 49.91   | 2769.94   | 36.37          | 369.28  | 3.4     | 3.7      | 167.003      | 19.442   | 553.847  | 115.56        | 3.4           |
| 11 | 5.7                               | 1977.25       | 40361.9    | 292.19  | 890.15    | 41.71          | 51.81   | 21.074  | 67.025   | 12185.581    | 297.869  | 51.839   | 116.709       | 12.323        |
| 12 | 8.83                              | 2709.09       | 111443.11  | 635.51  | 2585.9    | 138.08         | 10.24   | 13.119  | 31.21    | 8997.121     | 608.783  | 214.807  | 180.213       | 6.796         |
| 13 | 5.7                               | 5829.58       | 182581.8   | 104.47  | 1210.45   | 236.58         | 20.17   | 6.055   | 24.468   | 2799.609     | 488.586  | 143.708  | 735.674       | 3.4           |
| 14 | 16.16                             | 2194.55       | 132693.35  | 1791.9  | 3033.82   | 626.48         | 42.08   | 3.4     | 12.315   | 1016.418     | 799.02   | 756.675  | 281.281       | 3.4           |
| 15 | 5.7                               | 775.18        | 3410.38    | 91.6    | 973.68    | 96.86          | 3.2     | 3.4     | 3.7      | 55.2         | 91.176   | 204.084  | 18.2          | 3.4           |
| 16 | 5.7                               | 521.64        | 10958.01   | 21.63   | 601.26    | 3.1            | 3.81    | 3.4     | 3.7      | 28.663       | 6.4      | 42       | 24.608        | 3.4           |
| 17 | 13.49                             | 1334.07       | 30105.51   | 3219.58 | 3678.86   | 683.66         | 57.02   | 3.4     | 16.088   | 64.266       | 223.868  | 2539.938 | 147.855       | 3.4           |
| 18 | 22.64                             | 1078.24       | 15889.75   | 4093.33 | 2569.24   | 14.27          | 19.1    | 3.4     | 3.7      | 206.964      | 30.785   | 829.572  | 99.64         | 3.4           |
| 19 | 5.92                              | 1549.99       | 29084.75   | 175.09  | 13739.99  | 26.88          | 28.01   | 3.4     | 11.282   | 373.685      | 33.535   | 1475.38  | 184.583       | 3.4           |
| 20 | 5.7                               | 639.37        | 60744.87   | 95.27   | 1975.97   | 7.02           | 55.85   | 3.4     | 3.7      | 170.467      | 6.4      | 998.389  | 111.262       | 3.4           |
| 21 | 5.7                               | 2353.24       | 8571.28    | 58.72   | 4076.41   | 384.32         | 18.23   | 3.4     | 11.386   | 62.363       | 24.745   | 495.959  | 18.2          | 3.4           |
| 22 | 9.23                              | 4515.69       | 111486.92  | 284.2   | 2520.66   | 23.7           | 18.77   | 3.4     | 15.064   | 797.333      | 37.029   | 518.601  | 18.2          | 3.4           |
| 23 | 12.81                             | 2269.62       | 61254.93   | 75.22   | 6426.05   | 2231.99        | 117.31  | 108.568 | 537.944  | 1937.457     | 616.553  | 945.245  | 2216.514      | 19.21         |
| 24 | 5.7                               | 2059.77       | 20307.72   | 29.76   | 862.42    | 3.1            | 3.2     | 3.4     | 3.7      | 76.322       | 6.4      | 43.536   | 18.2          | 3.4           |
| 25 | 5.7                               | 1307.09       | 12291.31   | 389.24  | 4771.45   | 11.84          | 11.09   | 3.4     | 11.317   | 340.479      | 44.474   | 1605.544 | 18.2          | 3.4           |
| 26 | 5.7                               | 1204.98       | 9091.06    | 71.03   | 387.46    | 25.72          | 3.37    | 3.4     | 3.7      | 116.822      | 36.004   | 78.207   | 18.2          | 3.4           |
| 27 | 5.7                               | 663.77        | 18830.05   | 27.81   | 1793.85   | 3.1            | 5.22    | 3.4     | 3.7      | 245.896      | 6.4      | 584.074  | 18.2          | 3.4           |
| 28 | 5.7                               | 4509.78       | 13590.52   | 13.61   | 584.52    | 3.1            | 3.71    | 3.4     | 3.7      | 366.625      | 14.876   | 42       | 18.2          | 3.4           |
| 29 | 5.7                               | 1142.95       | 12671.65   | 50.25   | 149.98    | 39.19          | 20.31   | 3.4     | 5.473    | 341.073      | 39.216   | 42       | 369.494       | 5.547         |
| 30 | 5.7                               | 3248.07       | 6180.36    | 18.2    | 52.3      | 3.1            | 7.55    | 3.4     | 3.837    | 79.364       | 61.214   | 42       | 18.2          | 3.4           |
| 31 | 26.27                             | 16179         | 41399.37   | 15.22   | 221.71    | 3.1            | 3.2     | 3.4     | 4.08     | 1004.163     | 10.909   | 42       | 18.2          | 3.4           |
| 32 | 21.86                             | 19484.95      | 19043.89   | 36      | 314.68    | 4.85           | 3.96    | 3.4     | 3.7      | 100.768      | 46.16    | 105.993  | 18.2          | 3.4           |
| 33 | 11.21                             | 4707.08       | 237538.86  | 78.03   | 23168.52  | 6.7            | 61.95   | 3.4     | 237.61   | 1115.675     | 22.544   | 2059.297 | 77.032        | 3.4           |
| 34 | 5.7                               | 756.31        | 39425.63   | 186.18  | 1338.47   | 180.3          | 7.15    | 3.4     | 13.174   | 319.144      | 173.812  | 799.399  | 18.2          | 3.4           |
| 35 | 21.49                             | 32566.05      | 250311.48  | 55.96   | 799.52    | 10.52          | 7.53    | 5.772   | 24.775   | 2471.749     | 45.549   | 42       | 18.2          | 3.4           |
| 36 | 35.86                             | 1618.88       | 267270.66  | 495.25  | 50402.29  | 46.1           | 94.91   | 6.729   | 631.398  | 1622.757     | 367.227  | 6135.205 | 1536.202      | 14.954        |
| 37 | 35.83                             | 21135.2       | 848140.33  | 305.92  | 11373.15  | 16.03          | 124.42  | 16.798  | 858.702  | 9006.378     | 89.123   | 545.951  | 139.44        | 17.868        |
| 38 | 5.7                               | 662.39        | 399.43     | 376.72  | 410.73    | 25.59          | 3.2     | 3.4     | 3.7      | 7.4          | 6.4      | 77.98    | 18.2          | 3.4           |
| 39 | 6.94                              | 874.07        | 13922.03   | 150.78  | 11379.17  | 46.86          | 18.25   | 3.4     | 20.507   | 108.859      | 130.893  | 1396.778 | 18.2          | 3.4           |
| 40 | 6.17                              | 797.93        | 5934.51    | 853.13  | 1631.12   | 106.07         | 81.84   | 3.4     | 12.551   | 50.433       | 90.711   | 1469.665 | 140.564       | 3.4           |
| 41 | 5.7                               | 106.57        | 2040.68    | 200.77  | 1779.82   | 38.65          | 9.95    | 3.4     | 3.7      | 28.197       | 11.164   | 446.472  | 18.2          | 3.4           |
| 42 | 12.99                             | 4683.17       | 18828.01   | 187.95  | 175.23    | 7.55           | 64.92   | 7.832   | 43.954   | 2528.754     | 84.667   | 42       | 70.97         | 3.4           |
| 43 | 5.7                               | 546.73        | 1568.98    | 1082.26 | 2613.67   | 3.1            | 3.2     | 3.4     | 3.7      | 8.542        | 9.554    | 789.482  | 18.2          | 3.4           |
| 44 | 11.13                             | 1358.05       | 103643.56  | 477.19  | 60124.01  | 54.75          | 287.68  | 9.45    | 772.081  | 3446.045     | 2520.408 | 7865.425 | 5338.139      | 14.103        |
| 45 | 5.7                               | 189.39        | 5322.97    | 80.89   | 888.25    | 13.38          | 3.2     | 3.4     | 3.821    | 207.849      | 77.295   | 71.469   | 78.921        | 3.529         |
| 46 | 5.7                               | 377.84        | 18890.55   | 177.5   | 2704.49   | 133.97         | 7.15    | 3.4     | 4.136    | 163.512      | 84.552   | 197.687  | 116.914       | 3.4           |
| 47 | 5.7                               | 2114.78       | 5963.63    | 5.41    | 52.3      | 3.1            | 3.2     | 3.4     | 7.508    | 1324.231     | 81.496   | 42       | 18.2          | 3.4           |
| 48 | 5.7                               | 6617.13       | 646.42     | 47.88   | 688.71    | 3.1            | 22.21   | 3.4     | 3.7      | 110.995      | 6.4      | 42       | 18.2          | 3.4           |
| 49 | 5.7                               | 1267.45       | 8648.58    | 15.41   | 630.76    | 3.42           | 3.2     | 3.4     | 4.298    | 1484.917     | 29.305   | 42       | 18.2          | 3.4           |
| 50 | 5.7                               | 177.97        | 6704.49    | 407.73  | 3383.34   | 100.88         | 44.57   | 3.4     | 8.724    | 134.713      | 295.488  | 216.431  | 97.95         | 3.4           |
| 51 | 45.49                             | 10364.14      | 759304.8   | 182     | 51645.18  | 301.28         | 726.67  | 55.918  | 5922.187 | 44123.356    | 312.183  | 2766.35  | 324.87        | 89.176        |
| 52 | 5.75                              | 2099.99       | 1912.27    | 300.59  | 10365.35  | 3.1            | 11.78   | 3.4     | 6.415    | 47.537       | 7.44     | 480.09   | 18.2          | 3.4           |
| 53 | 9.880                             | 856.150       | 5629.190   | 112.170 | 129.000   | 20.860         | 883.240 | 3.400   | 3.700    | 231.966      | 121.395  | 42.000   | 130.968       | 3.400         |
| 54 | 5.700                             | 7541.270      | 8704.770   | 114.870 | 8163.930  | 5.930          | 12.260  | 3.400   | 4.813    | 44.575       | 6.867    | 1092.643 | 18.200        | 3.400         |
| 55 | 5.700                             | 242.560       | 5814.750   | 284.810 | 2328.790  | 11.040         | 7.470   | 3.400   | 5.716    | 41.325       | 38.747   | 377.049  | 47.372        | 3.400         |
| 56 | 5.700                             | 975.540       | 4355.790   | 72.040  | 1045.210  | 13.870         | 16.820  | 3.400   | 3.700    | 122.206      | 9.498    | 166.812  | 18.200        | 3.400         |
| 57 | 5.700                             | 851.090       | 15804.470  | 20.830  | 2502.670  | 3.100          | 16.640  | 8.260   | 20.269   | 157.677      | 18.744   | 242.734  | 18.200        | 3.400         |
| 58 | 5.700                             | 321.580       | 2191.980   | 9.990   | 346.410   | 3.100          | 3.200   | 3.400   | 3.700    | 156.583      | 40.711   | 46.818   | 18.200        | 3.400         |
| 59 | 16.420                            | 9136.970      | 152473.790 | 43.120  | 1000.390  | 42.210         | 25.590  | 9.656   | 30.186   | 3574.753     | 624.588  | 75.592   | 121.431       | 3.400         |
| 60 | 6.860                             | 404.880       | 134311.350 | 390.630 | 3693.260  | 620.470        | 781.570 | 193.261 | 57.991   | 726.529      | 43.562   | 869.808  | 3518.019      | 41.070        |
| 61 | 30.000                            | 5395.710      | 75391.150  | 35.640  | 72933.750 | 15.330         | 72.490  | 5.287   | 92.809   | 848.622      | 67.782   | 7709.493 | 140.897       | 23.053        |
| 62 | 5.700                             | 4350.300      | 3646.050   | 63.260  | 262.730   | 3.100          | 5.490   | 3.400   | 3.700    | 67.968       | 6.400    | 42.000   | 18.200        | 3.400         |
| 63 | 5.700                             | 2616.760      | 19580.610  | 280.440 | 194.100   | 27.700         | 10.480  | 3.400   | 3.700    | 512.775      | 227.457  | 42.000   | 18.200        | 3.400         |
| 64 | 10.830                            | 642.950       | 52084.840  | 304.520 | 2551.110  | 223.010        | 354.470 | 514.722 | 138.138  | 2232.719     | 141.965  | 207.843  | 2298.560      | 50.961        |
| 65 | 5.700                             | 466.390       | 16125.890  | 383.440 | 2600.650  | 10.960         | 367.830 | 212.413 | 3.700    | 67.744       | 32.516   | 208.469  | 301.594       | 6.789         |

Table S3. Metadata and immunological data dictionary

| Term                               | Definition                                                                                                                                                                      |
|------------------------------------|---------------------------------------------------------------------------------------------------------------------------------------------------------------------------------|
| HIV                                | HIV-1/2 Ab Serology (0 = Negative; 1 = Positive)                                                                                                                                |
| Chlamydia                          | First-void urine nucleid acid amplification test (NAAT; 0 = Negative; 1 = Positive)                                                                                             |
| Gonorrhea                          | First-void urine nucleid acid amplification test (NAAT; 0 = Negative; 1 = Positive)                                                                                             |
| Nugent BV<br>Nugent                | Vaginal smear Gram's stains assessed by Nugent's criteria ( $\leq 6 = 0$ ; $\geq 7 = 1$ )                                                                                       |
| Intermediate<br>Microbiota         | Vaginal smear Gram's stains assessed by Nugent's criteria ( $\leq 3 = 0$ ; $4-6 = 1$ ; $\geq 7 = 0$ )                                                                           |
| HSV-1                              | HerpeSelect® gG-1 ELISA (0 = Negative; 1 = Positive)                                                                                                                            |
| HSV-2                              | HerpeSelect® gG-2 ELISA (0 = Negative; 1 = Positive)                                                                                                                            |
| HPV                                | Roche Linear Array for any HPV type (0 = Negative; 1 = Positive)                                                                                                                |
| HR-HPV                             | Roche Linear Array for any High Risk HPV type (0 = Negative; 1 = Positive)                                                                                                      |
| Clear HPV                          | Roche Linear Array positive for any HPV type then negative upon re-test at 6 months (0 = No Clear; 1 = Clear)                                                                   |
| Persist HPV                        | Roche Linear Array positive for any HPV type then positive for same type upon re-test at 6 months (0 = No Persistence; 1 = Persistent)                                          |
| #CD4 T Cells                       | Absolute number of CD4 T cells per endocervical cytobrush                                                                                                                       |
| #CD4+ CCR5+                        | Absolute number of CCR5+ CD4 T cells per endocervical cytobrush                                                                                                                 |
| %CCR5+ of<br>CD4+                  | Proportion of endocervical CD4 T cells expressing CCR5                                                                                                                          |
| #CD4+ CD69+                        | Absolute number of CD69+ CD4 T cells per endocervical cytobrush                                                                                                                 |
| %CD69+ of<br>CD4+                  | Proportion of endocervical CD4 T cells expressing CD69                                                                                                                          |
| #CD4+ CD38+<br>HLADR+              | Absolute number of CD38+HLA-DR+ CD4 T cells per endocervical cytobrush                                                                                                          |
| %CD38+<br>HLADR+ of<br>CD4+        | Proportion of endocervical CD4 T cells expressing CD38 and HLA-DR                                                                                                               |
| #CD4+ $\alpha 4\beta 7$ +          | Absolute number of $\alpha 4\beta 7$ + CD4 T cells per endocervical cytobrush                                                                                                   |
| % $\alpha 4\beta 7$ + of<br>CD4+   | Proportion of endocervical CD4 T cells expressing $\alpha 4\beta 7$                                                                                                             |
| #Langerhans<br>#mDC                | Absolute number of Langerhans cells (CD1a+Langerin+) per endocervical cytobrush<br>Absolute number of myeloid dendritic cells (mDC; CD14-CD11c+) per endocervical cytobrush     |
| #mDC exp. MR<br>%MR+ of mDC        | Absolute number of mDC expressing mannose receptor (MR; CD206) per endocervical cytobrush<br>Proportion of endocervical mDC expressing mannose receptor (MR; CD206)             |
| #mDC exp.<br>DCSIGN                | Absolute number of mDC expressing DC-SIGN per endocervical cytobrush                                                                                                            |
| %DCSIGN+ of<br>mDC                 | Proportion of endocervical mDC expressing DC-SIGN                                                                                                                               |
| #Monocytes                         | Absolute number of monocytes (CD14+) per endocervical cytobrush                                                                                                                 |
| #Monocytes<br>exp. MR              | Absolute number of monocytes expressing mannose receptor (MR; CD206) per endocervical cytobrush                                                                                 |
| %MR+ of<br>Monocytes               | Proportion of endocervical monocytes expressing mannose receptor (MR; CD206)                                                                                                    |
| #Monocytes<br>exp. DCSIGN          | Absolute number of monocytes expressing DC-SIGN per endocervical cytobrush                                                                                                      |
| %DCSIGN+ of<br>Monocytes           | Proportion of endocervical monocytes expressing DC-SIGN                                                                                                                         |
| CD4+ T cell<br>Subsets in<br>Blood | Proportion of systemic CD4+ T cells expressing various markers                                                                                                                  |
| Cervico-vaginal<br>Cytokines       | Concentration (pg/mL) of cytokines in undiluted cervico-vaginal secretions collected by Instead Softcup<br>(see Table S4 for the lower limit of quantification (LLOQ) for each) |
